# Supplementary material for: Integration of the Microbiome, Metabolome and Transcriptomics Data Identified Novel Metabolic Pathway Regulation in Colorectal Cancer
Source: MDPI journal article supplement (doi:10.3390/ijms22115763), 2021-05-28
Supplement: s1 [file s1]

Table S4: Pairwise interactions between microbial/metabolomic features in Figure 3(b). An AND relation between a feature in Feature 1 and corresponding feature in Feature 2 is likely associated with a change in CRC risk. Notation used: increased (+), decreased (-).

| Feature 1                    | Feature 2                                       | CRC Risk |
|------------------------------|-------------------------------------------------|----------|
| ChoE(20:4) (+)               | Staphylococcus (OTU7517) (+)                    | +        |
| ChoE(20:4) (-)               | Staphylococcus (OTU7517) (-)                    | -        |
| ChoE(20:4) (+)               | Blautia (OTU14967) (-)                          | +        |
| ChoE(20:4) (-)               | Blautia (OTU14967) (+)                          | -        |
| ChoE(20:4) (+)               | Roseburia (OTU9785) (+)                         | +        |
| ChoE(20:4) (-)               | Roseburia (OTU9785) (-)                         | -        |
| Staphylococcus (OTU7517) (+) | Roseburia (OTU9785) (+)                         | +        |
| Staphylococcus (OTU7517) (-) | Roseburia (OTU9785) (-)                         | -        |
| Blautia (OTU14967) (+)       | Unknown genus of Lachnospiraceae (OTU17213) (+) | -        |
| Blautia (OTU14967) (-)       | Unknown genus of Lachnospiraceae (OTU17213) (-) | +        |
