# Supplementary material for: Integration of the Microbiome, Metabolome and Transcriptomics Data Identified Novel Metabolic Pathway Regulation in Colorectal Cancer
Source: MDPI journal article supplement (doi:10.3390/ijms22115763), 2021-05-28
Supplement: s1 [file s1]

Table S3: Pairwise interactions between microbial/metabolomic features in Figure 2 and Feature 1 and corresponding feature in Feature 2 is likely associated with a change in CRC risk. Notation used: increased (+), decreased (-).

| Feature 1              | Feature 2                                | CRC Risk |
|------------------------|------------------------------------------|----------|
| 5-aminovalerate (+)    | Harmane (-)                              | +        |
| 5-aminovalerate (-)    | Harmane (+)                              | -        |
| 5-aminovalerate (+)    | 1,2-Dilinoleoyl-GPC (18:2/18:2) (+)      | +        |
| 5-aminovalerate (-)    | 1,2-Dilinoleoyl-GPC (18:2/18:2) (-)      | -        |
| 5-aminovalerate (+)    | 1-oleoyl-2-linoleoyl-GPC (18:1/18:2) (+) | +        |
| 5-aminovalerate (-)    | 1-oleoyl-2-linoleoyl-GPC (18:1/18:2) (-) | -        |
| 5-aminovalerate (+)    | Guanosine (-)                            | +        |
| 5-aminovalerate (-)    | Guanosine (+)                            | -        |
| 5-aminovalerate (+)    | N-acetylvaline (+)                       | +        |
| 5-aminovalerate (-)    | N-acetylvaline (-)                       | -        |
| 5-aminovalerate (+)    | Indolin-2-one (+)                        | +        |
| 5-aminovalerate (+)    | arabonate/xylonate (-)                   | +        |
| 5-aminovalerate (+)    | Glycerate (-)                            | +        |
| 5-aminovalerate (-)    | Glycerate (+)                            | -        |
| 5-aminovalerate (+)    | N-formylmethionine (-)                   | +        |
| 5-aminovalerate (-)    | N-formylmethionine (+)                   | -        |
| 5-aminovalerate (+)    | Adlercreutzia (OTU2) (+)                 | +        |
| 5-aminovalerate (-)    | Adlercreutzia (OTU2) (-)                 | -        |
| 5-aminovalerate (+)    | Pyridoxamine (-)                         | +        |
| 5-aminovalerate (-)    | Pyridoxamine (+)                         | -        |
| Indolin-2-one (+)      | 1,2-Dilinoleoyl-GPC (18:2/18:2) (+)      | +        |
| Indolin-2-one (-)      | 1,2-Dilinoleoyl-GPC (18:2/18:2) (-)      | -        |
| Indolin-2-one (+)      | docosaehaenoate (DHA; 22:6n3) (+)        | +        |
| Indolin-2-one (-)      | docosaehaenoate (DHA; 22:6n3) (-)        | -        |
| arabonate/xylonate (+) | 1,2-Dilinoleoyl-GPC (18:2/18:2) (-)      | -        |
| arabonate/xylonate (-) | 1,2-Dilinoleoyl-GPC (18:2/18:2) (+)      | +        |
