# Supplementary material for: Integration of the Microbiome, Metabolome and Transcriptomics Data Identified Novel Metabolic Pathway Regulation in Colorectal Cancer
Source: MDPI journal article supplement (doi:10.3390/ijms22115763), 2021-05-28
Supplement: s1 [file s1]

# Partial Dependence Plot

Partial Effect (Probits)

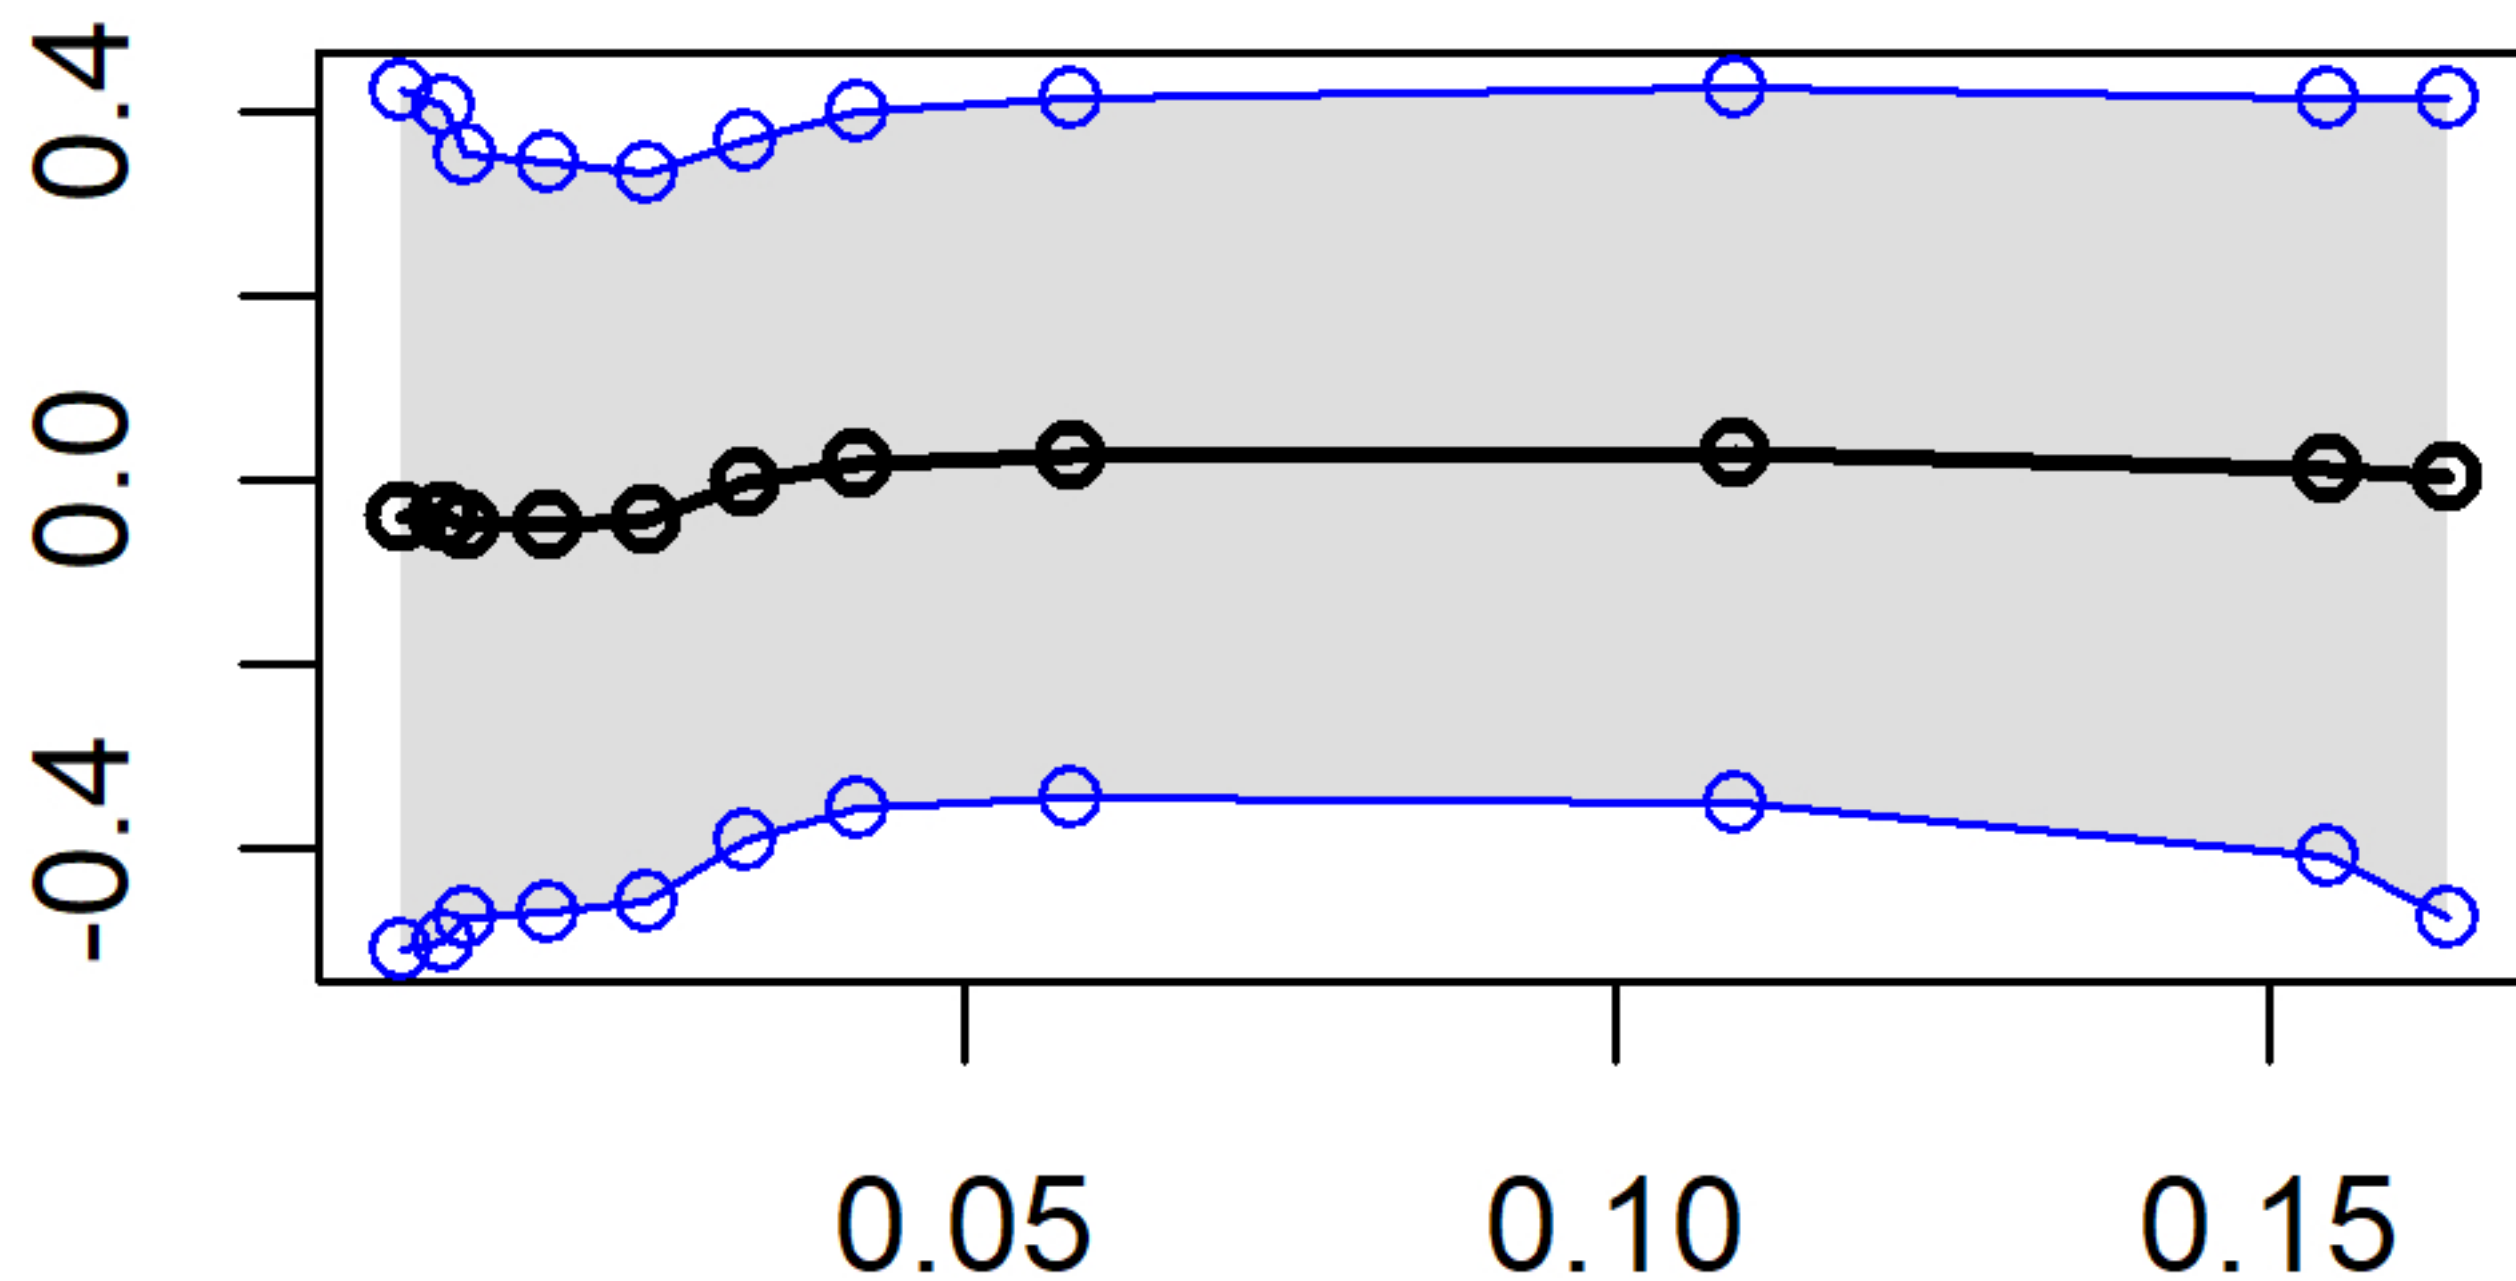

OTU37 plotted at specified quantiles

# Partial Dependence Plot

Partial Effect (Probits)

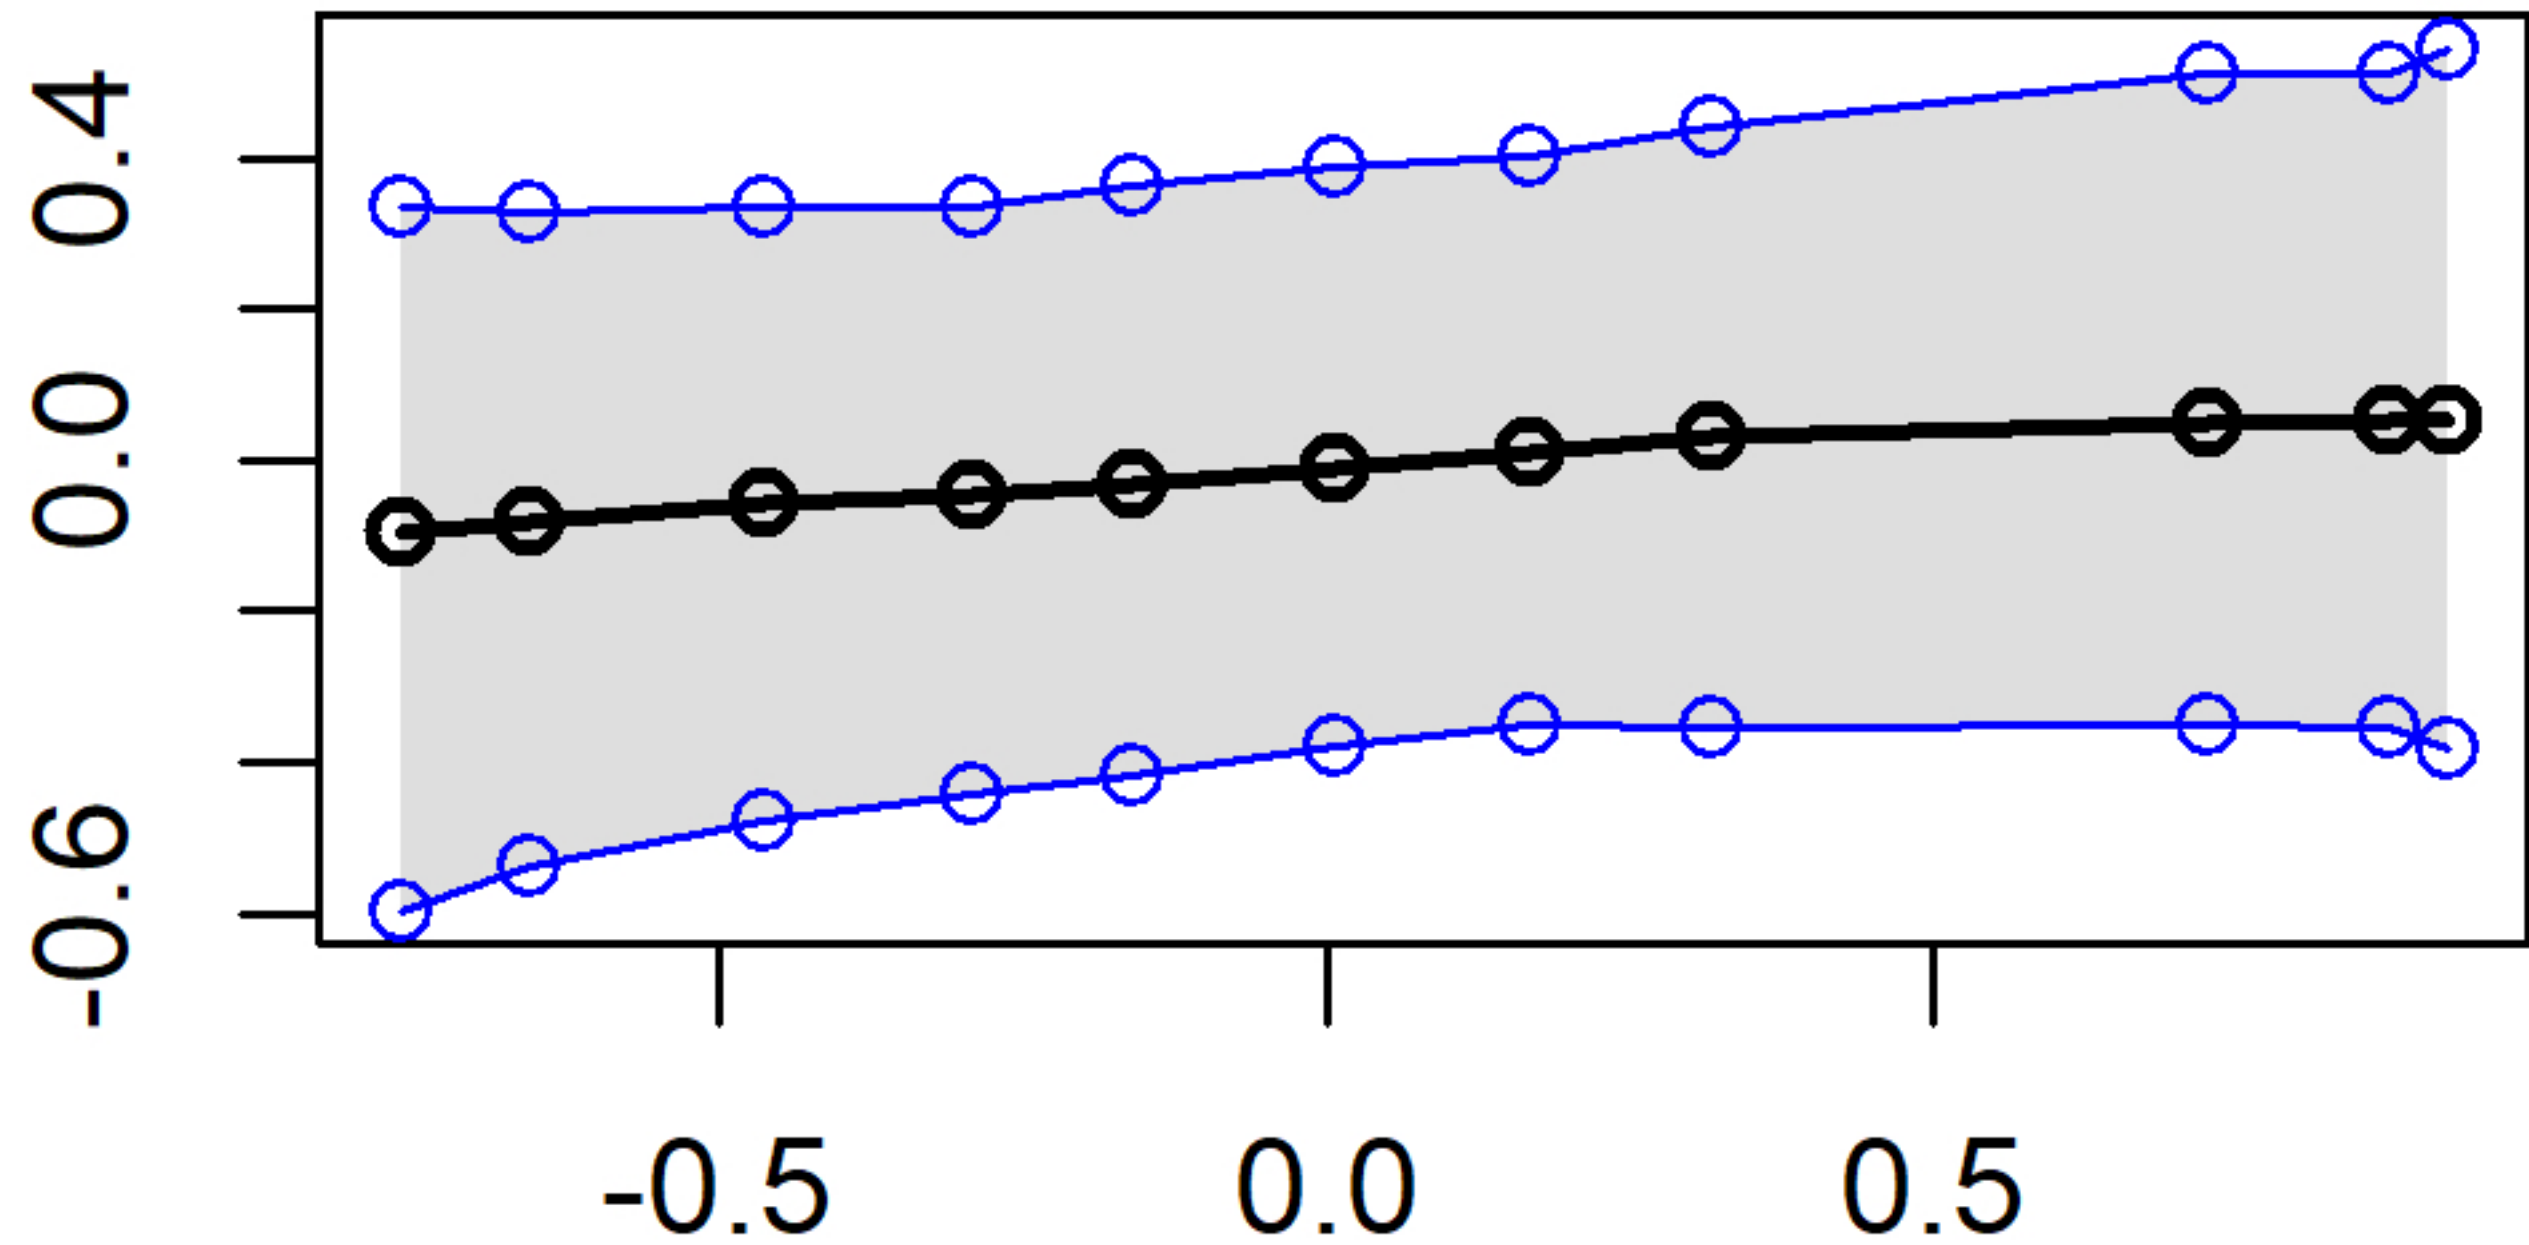

CHOLESTEROL plotted at specified quantiles

# Partial Dependence Plot

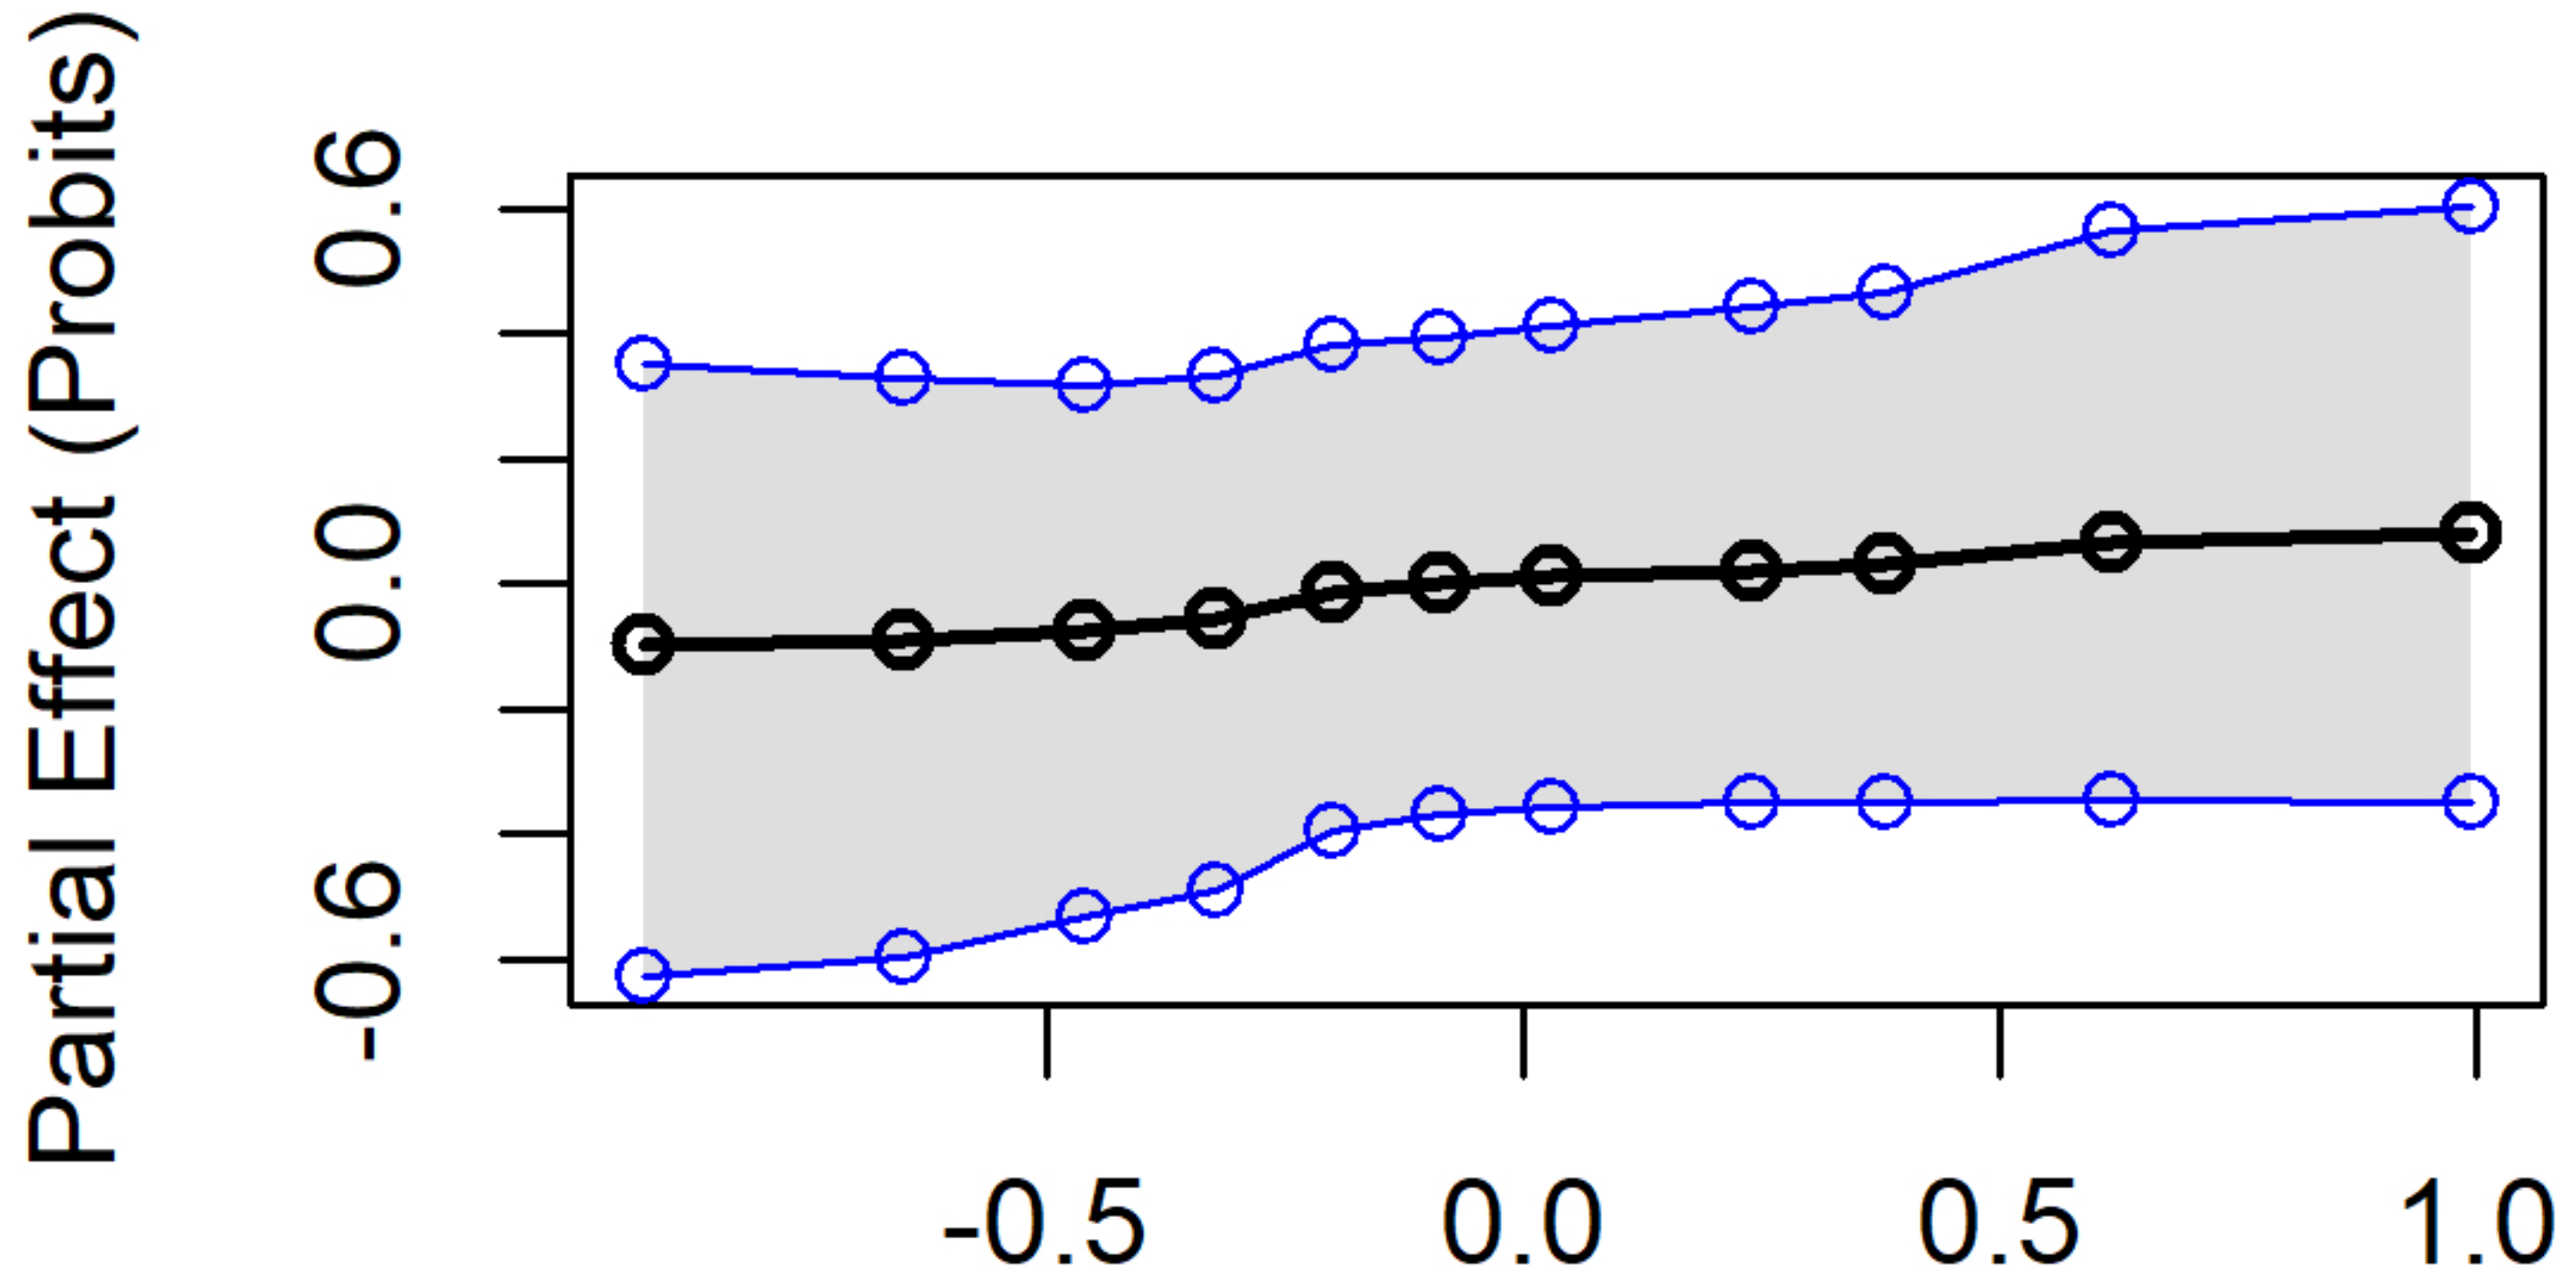

DOCOSAHEXAENOATE plotted at specified quanti

# Partial Dependence Plot

Partial Effect (Probits)

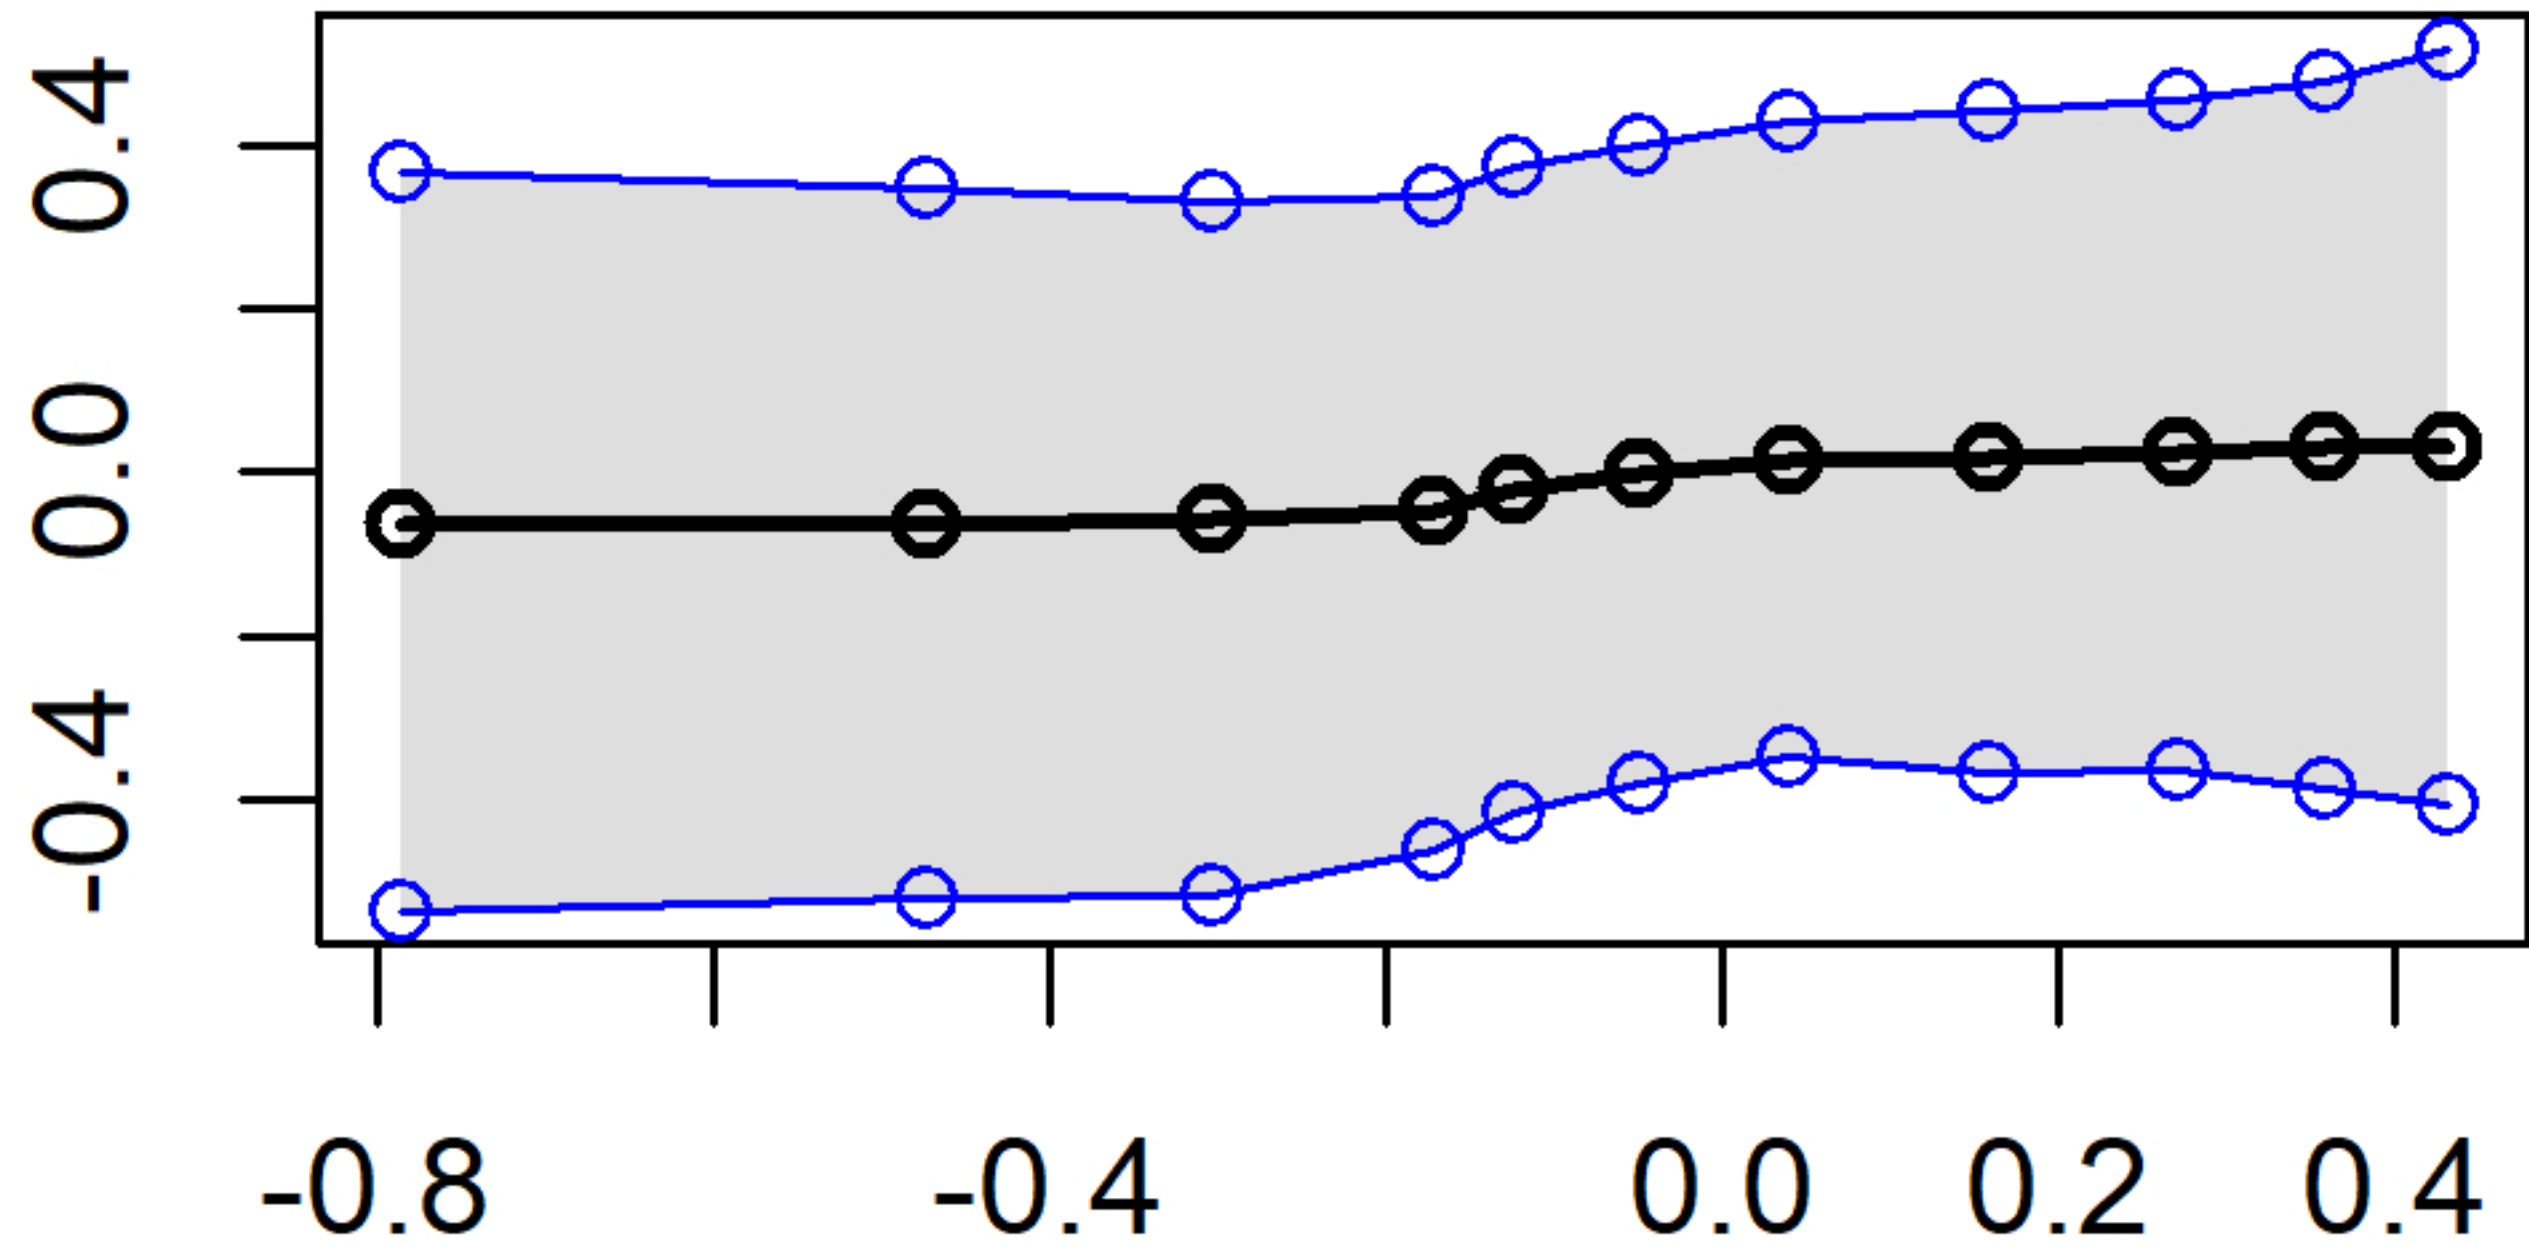

LITHOCHOLATE plotted at specified quantiles

# Partial Dependence Plot

Partial Effect (Probits)

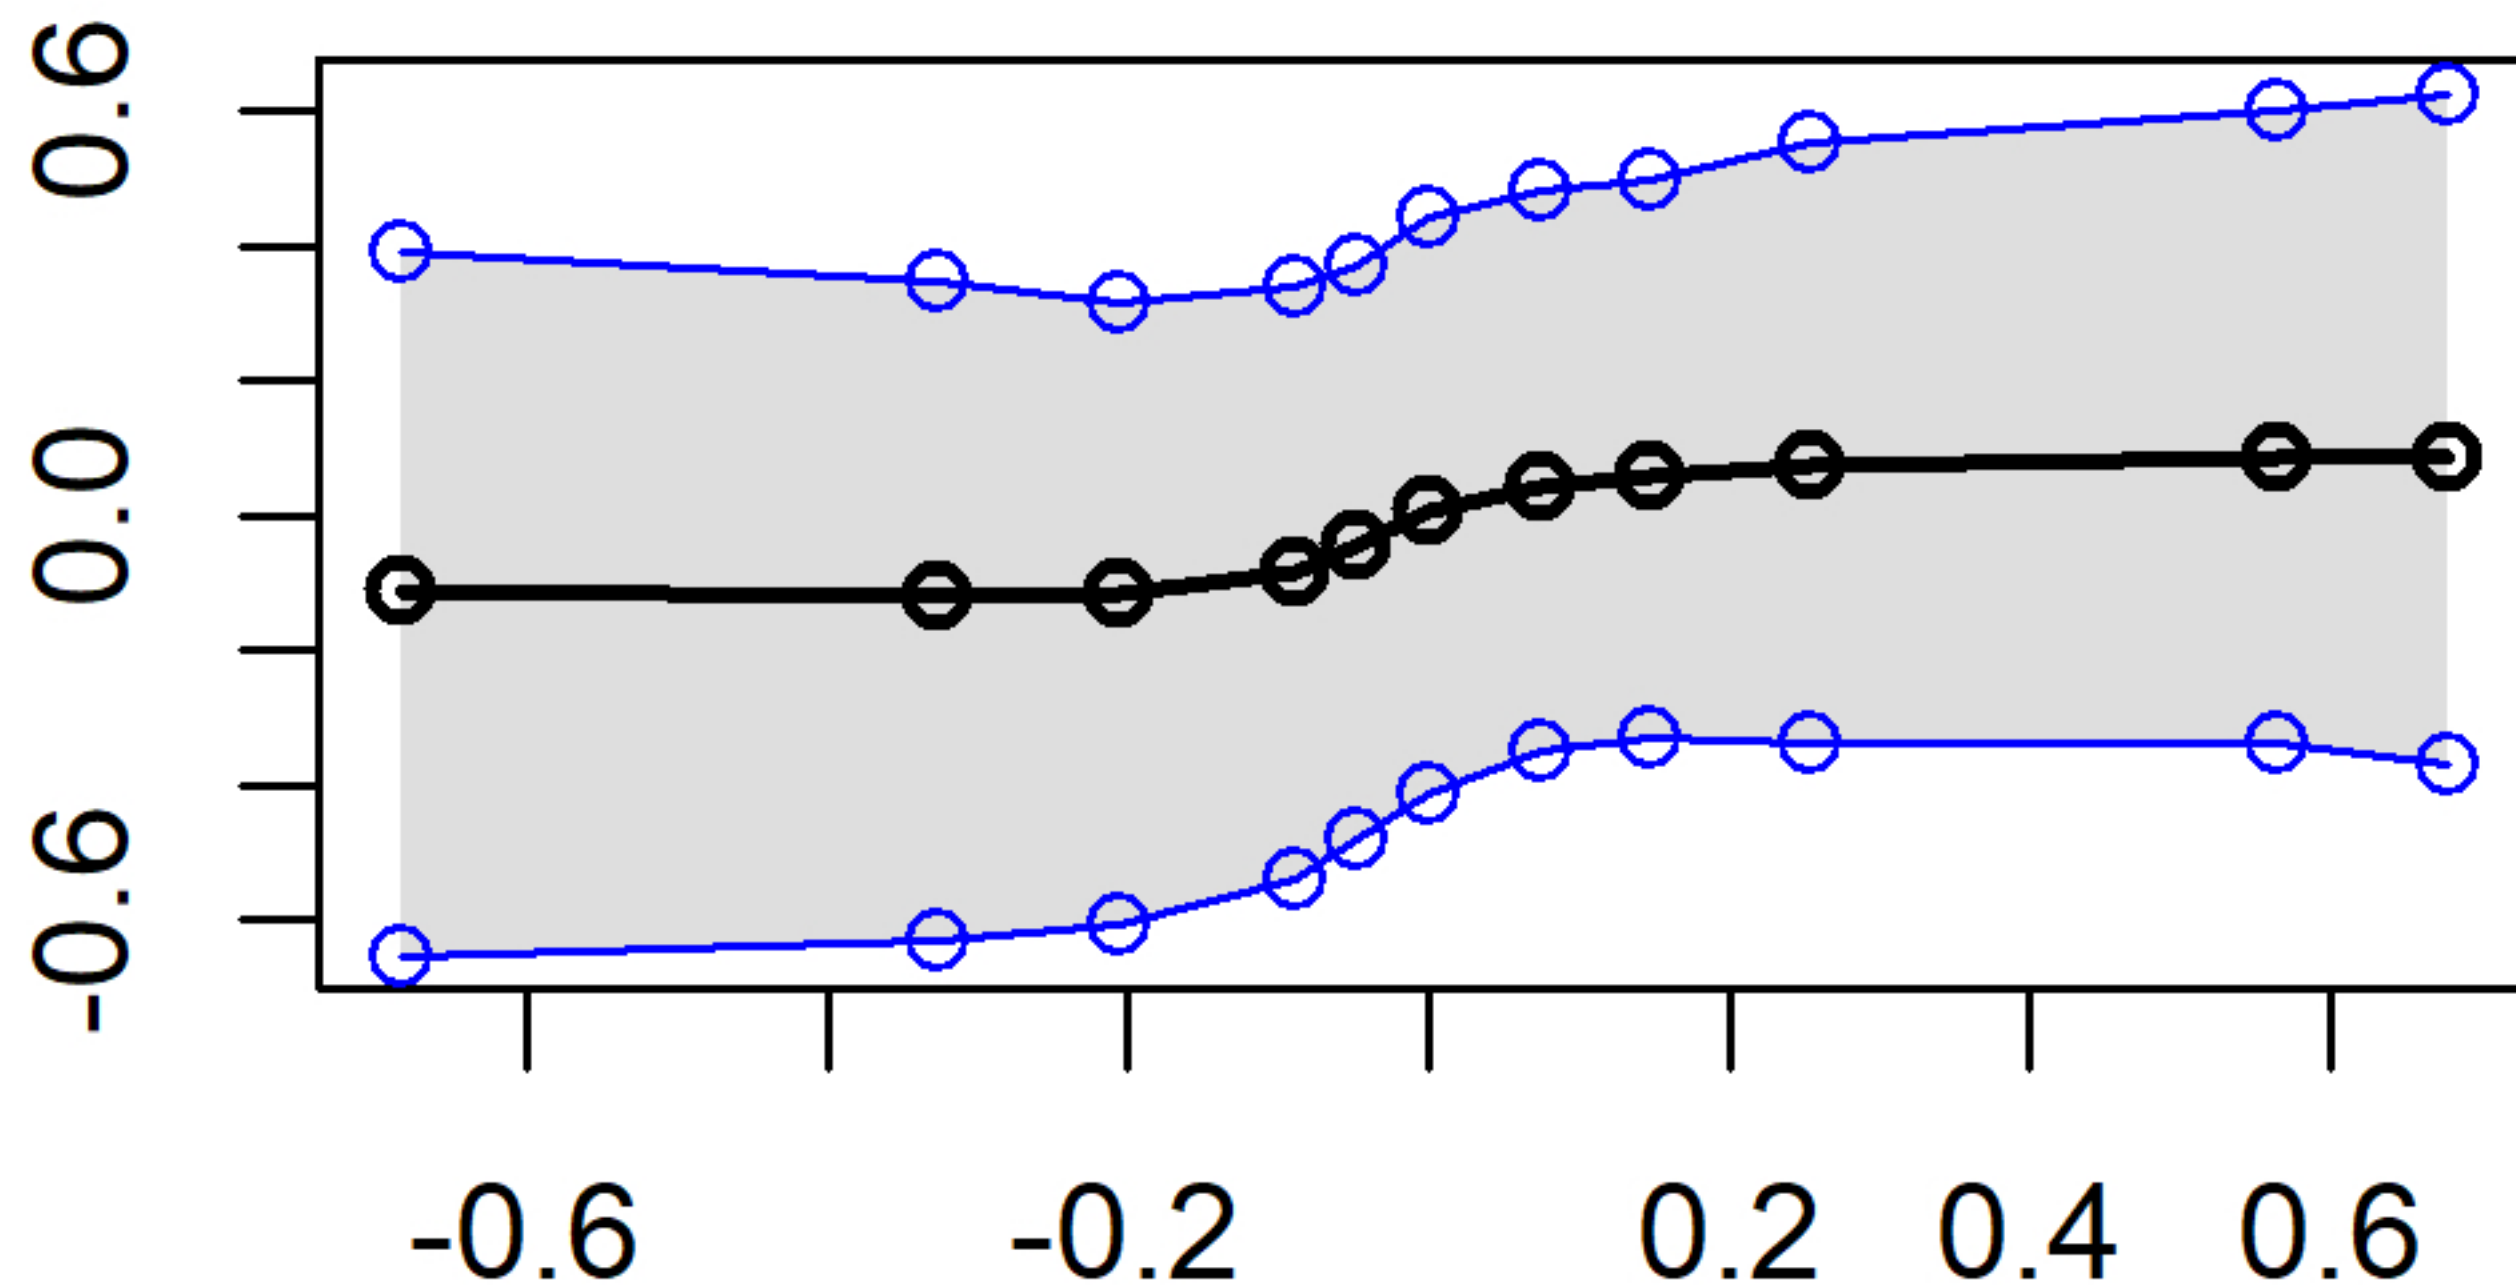

N\_ACETYLVALINE plotted at specified quantiles

# Partial Dependence Plot

Partial Effect (Probits)

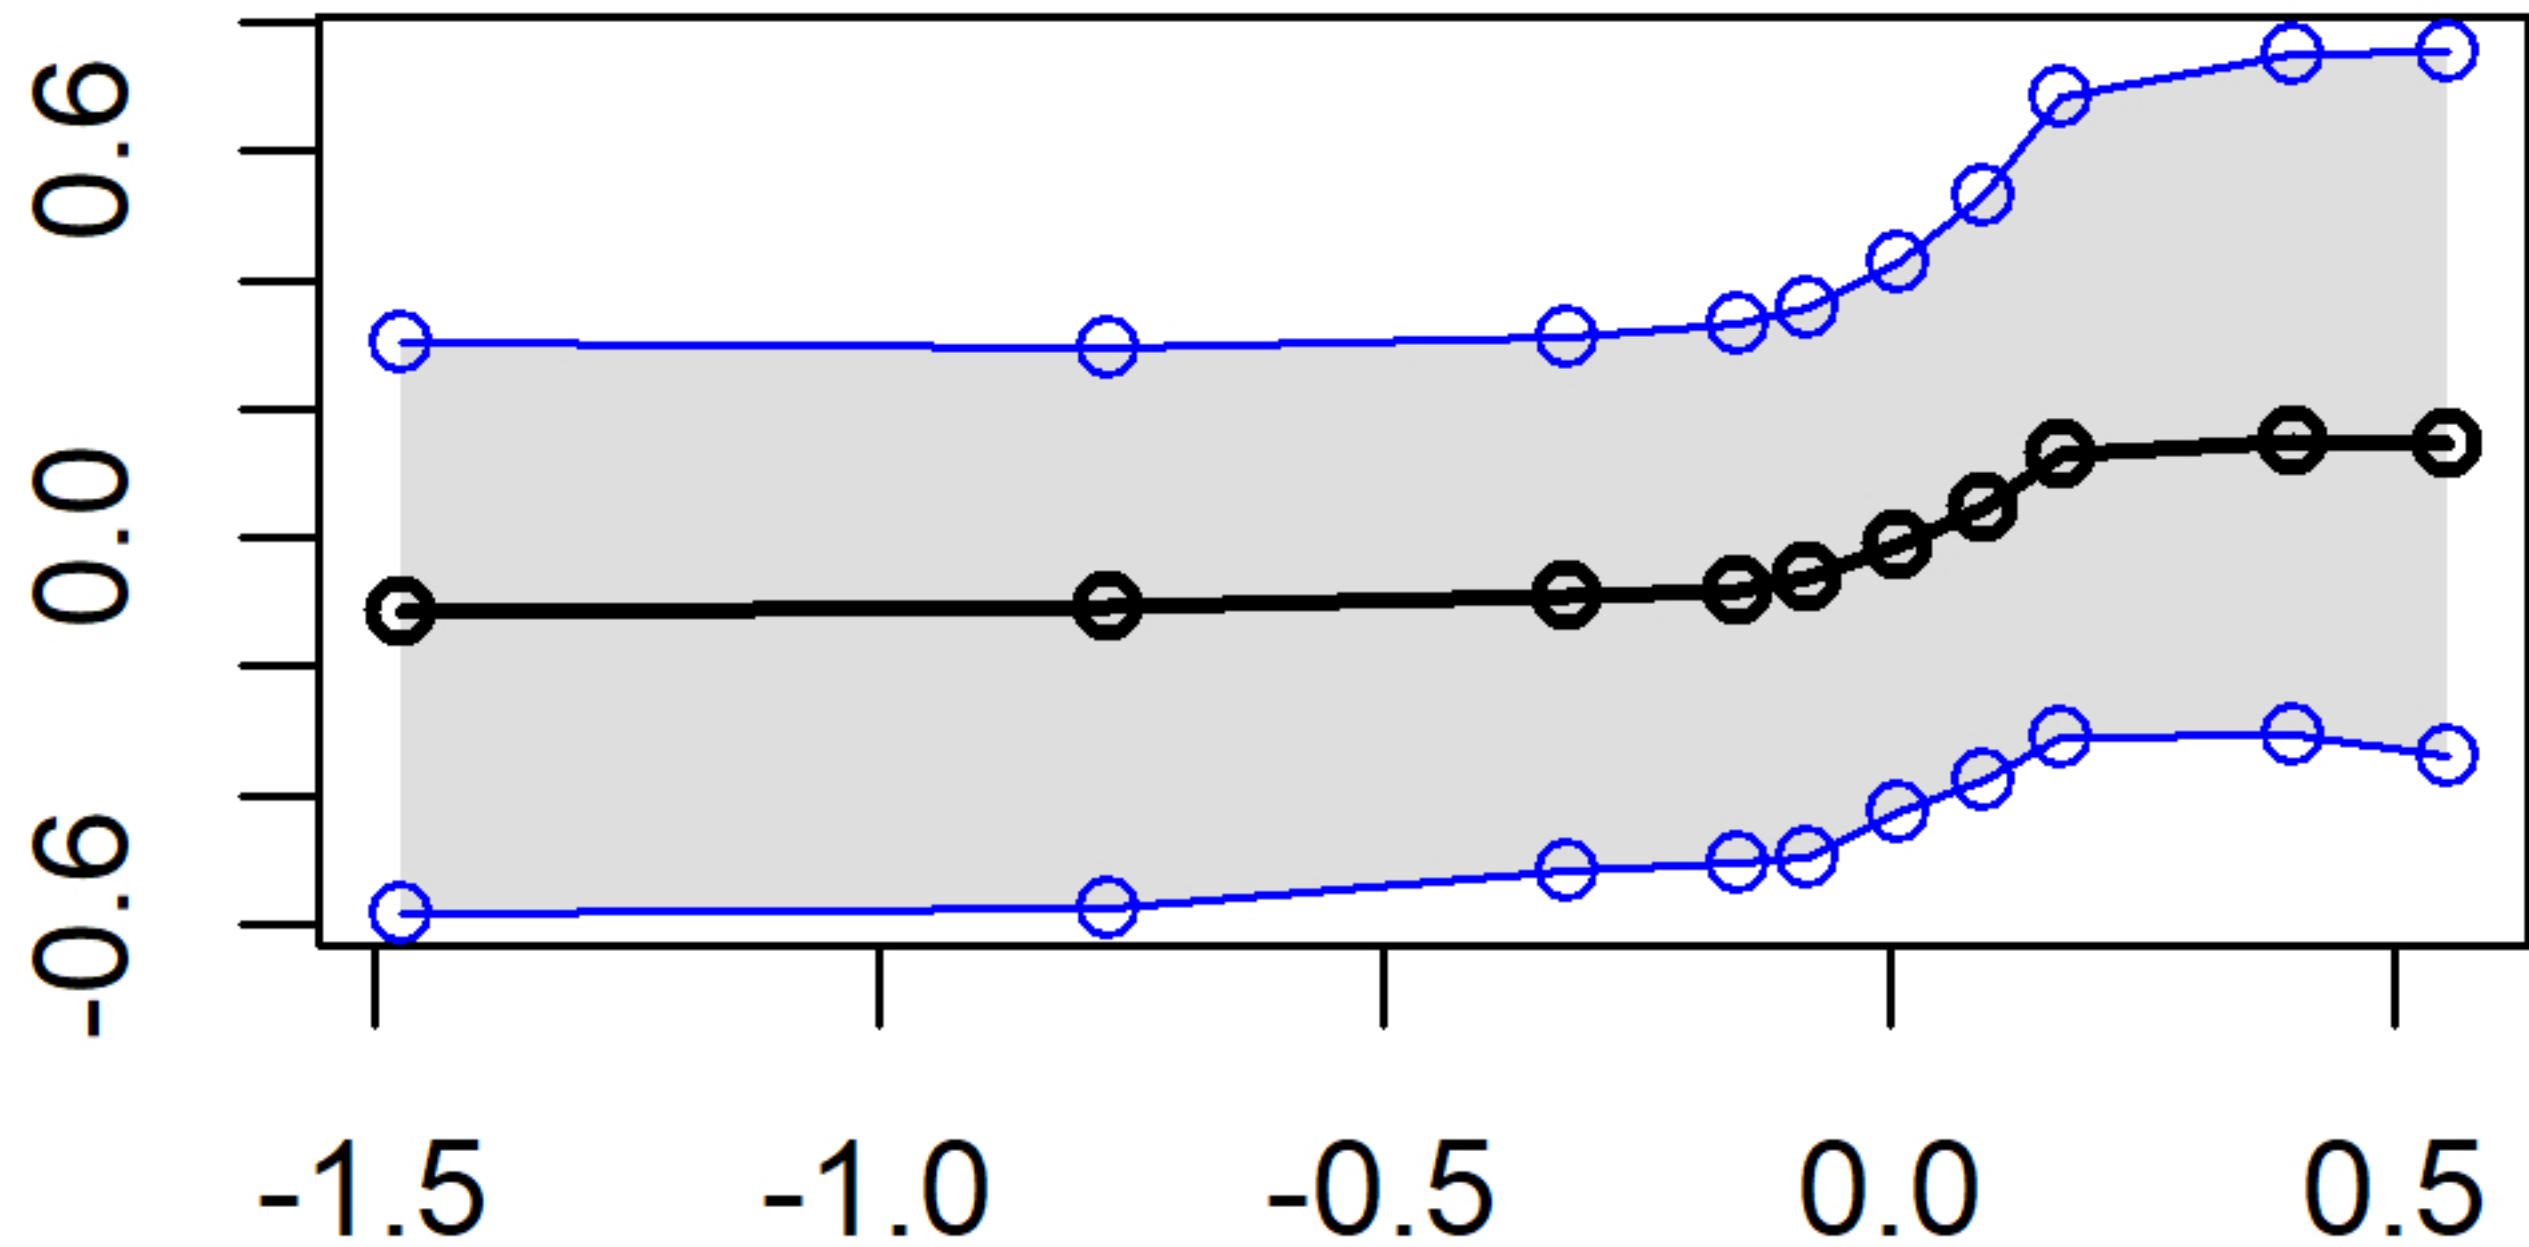

NORVALINE plotted at specified quantiles



# Partial Dependence Plot

Partial Effect (Probits)

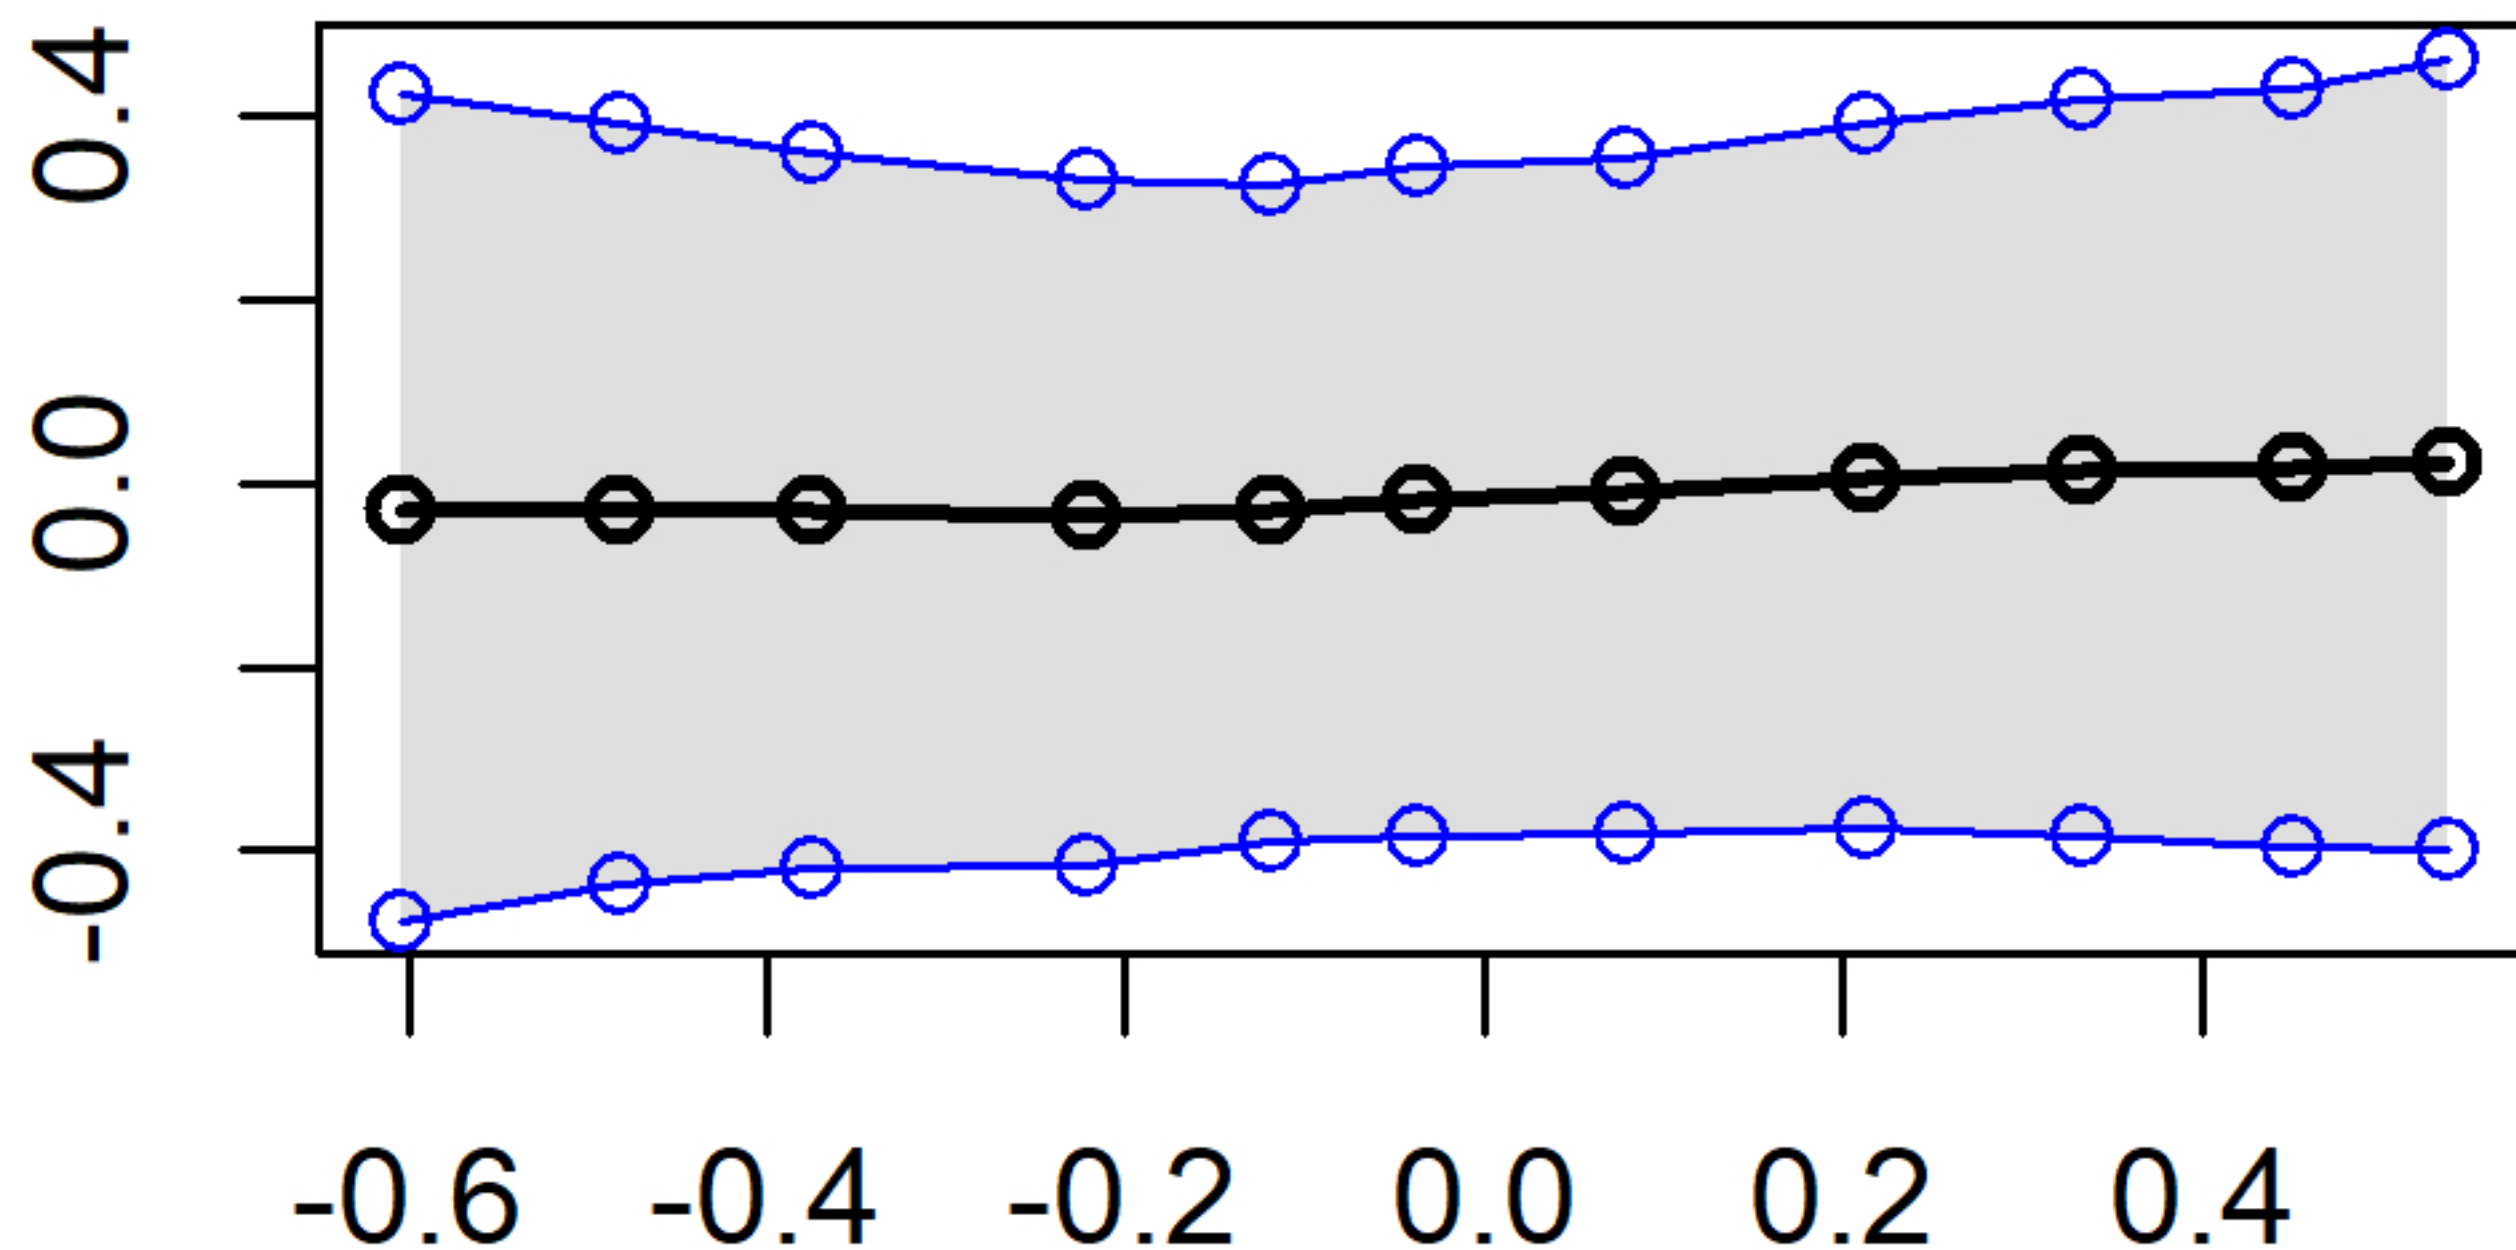

`_HYDROXY_5_CHOLENOIC_ACID` plotted at specific

# Partial Dependence Plot

Partial Effect (Probits)

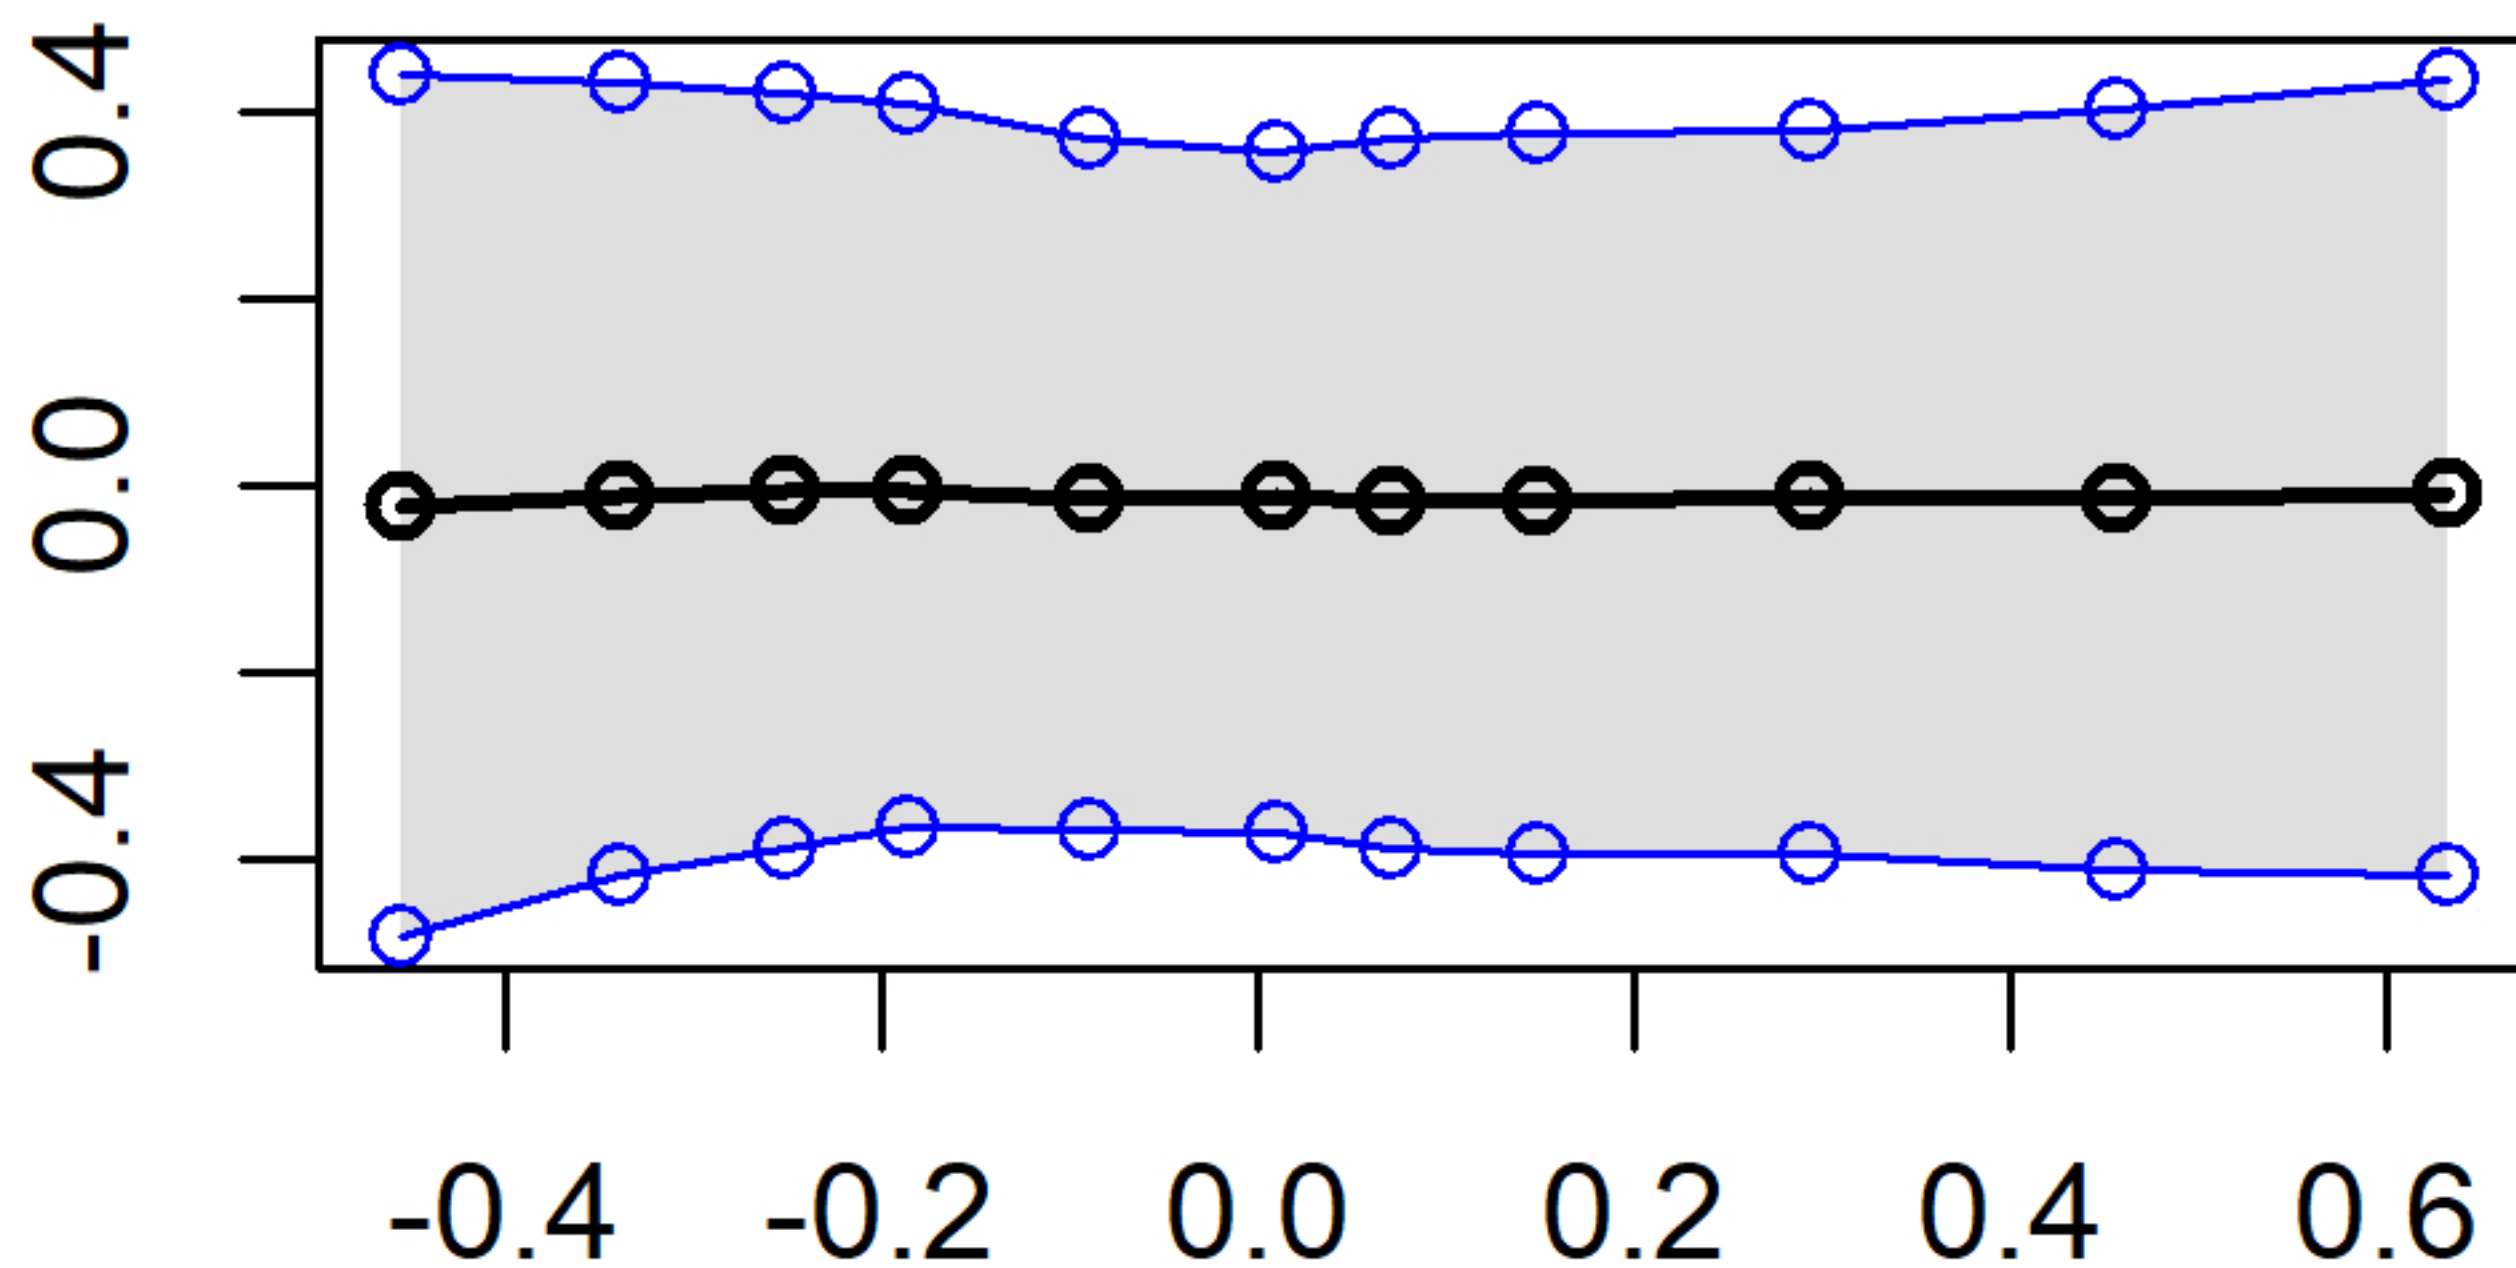

BILIVERDIN plotted at specified quantiles



# Partial Dependence Plot

Partial Effect (Probits)

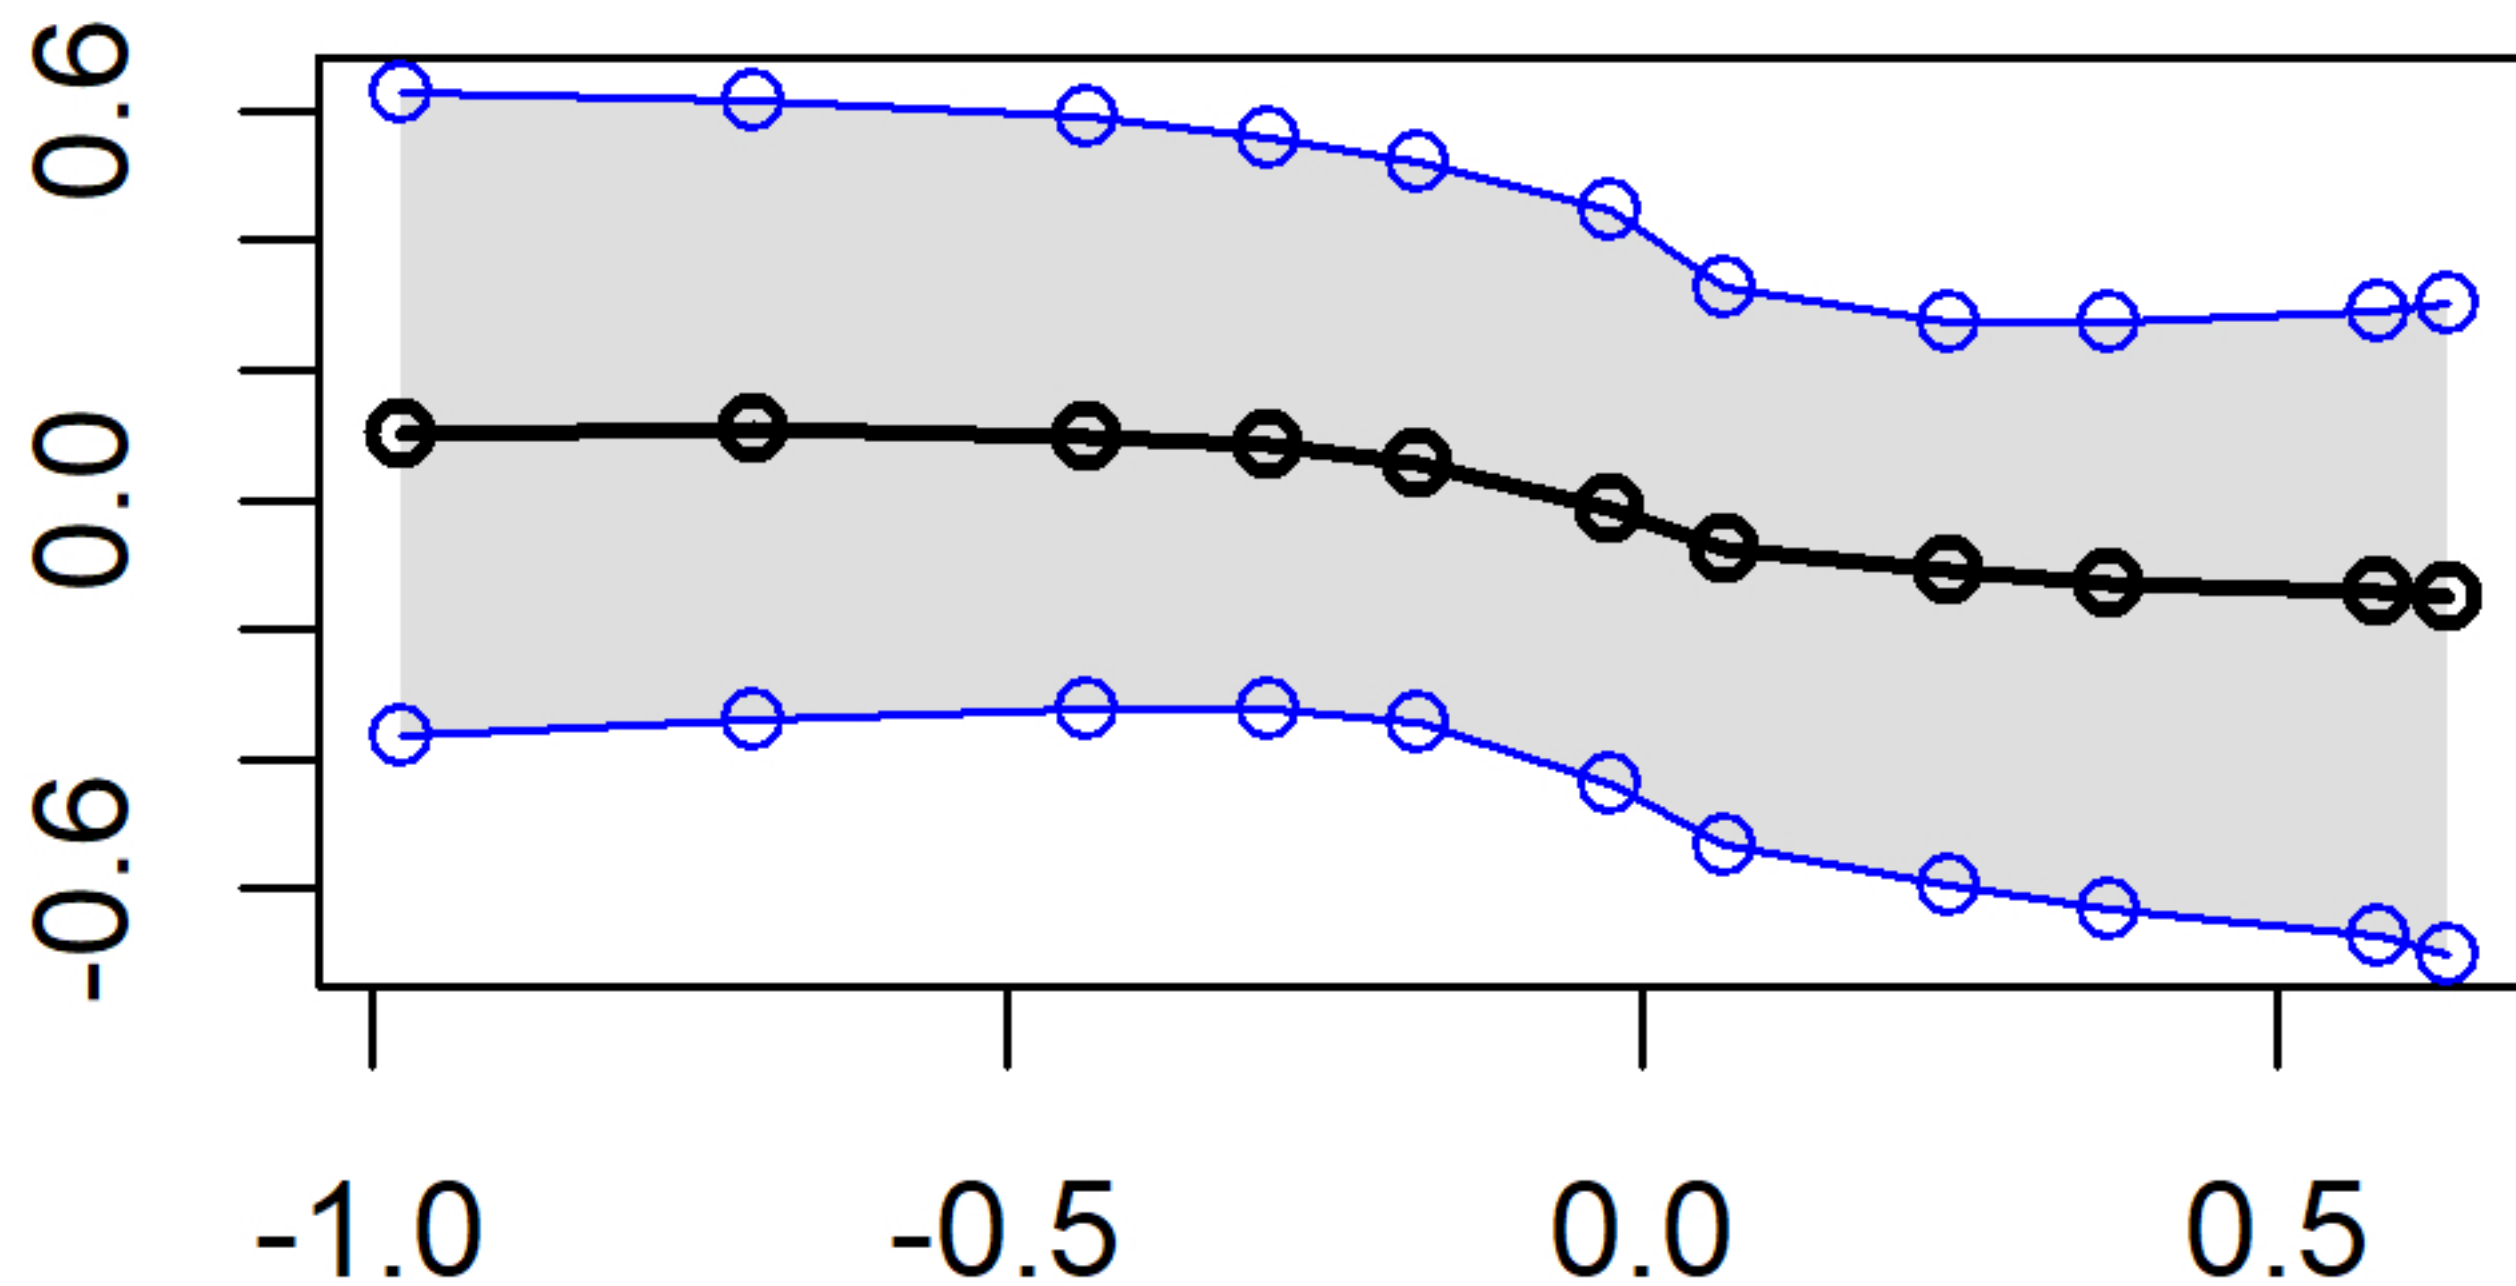

GUANOSINE plotted at specified quantiles

# Partial Dependence Plot

Partial Effect (Probits)

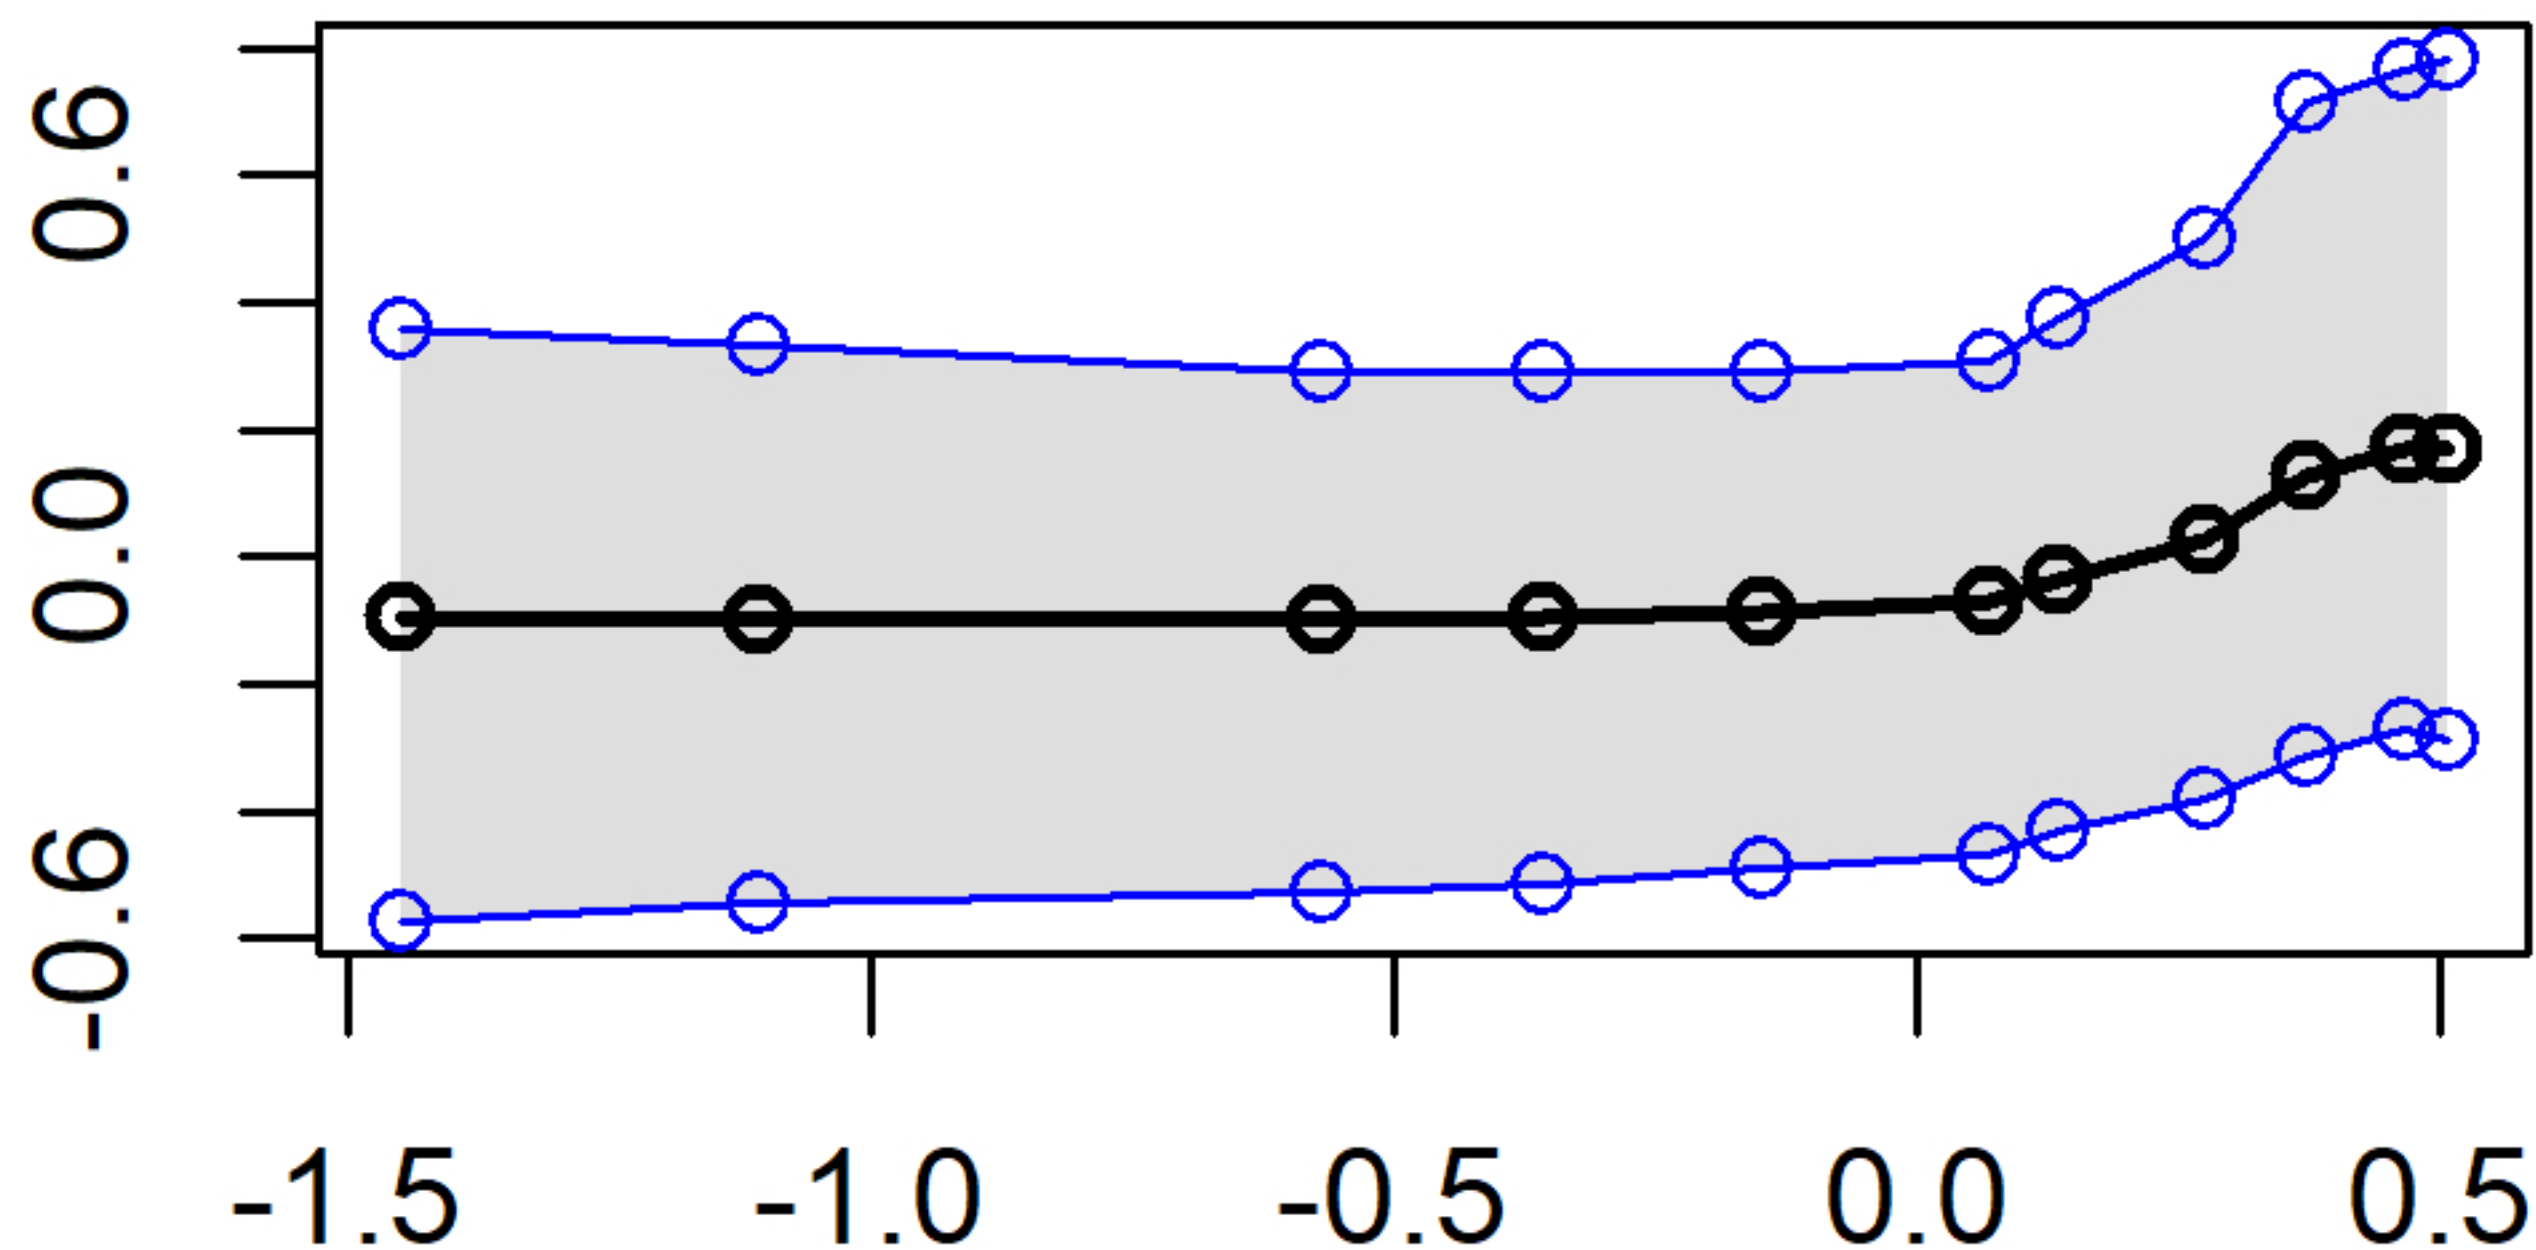

INDOLIN\_2\_ONE plotted at specified quantiles

# Partial Dependence Plot

Partial Effect (Probits)

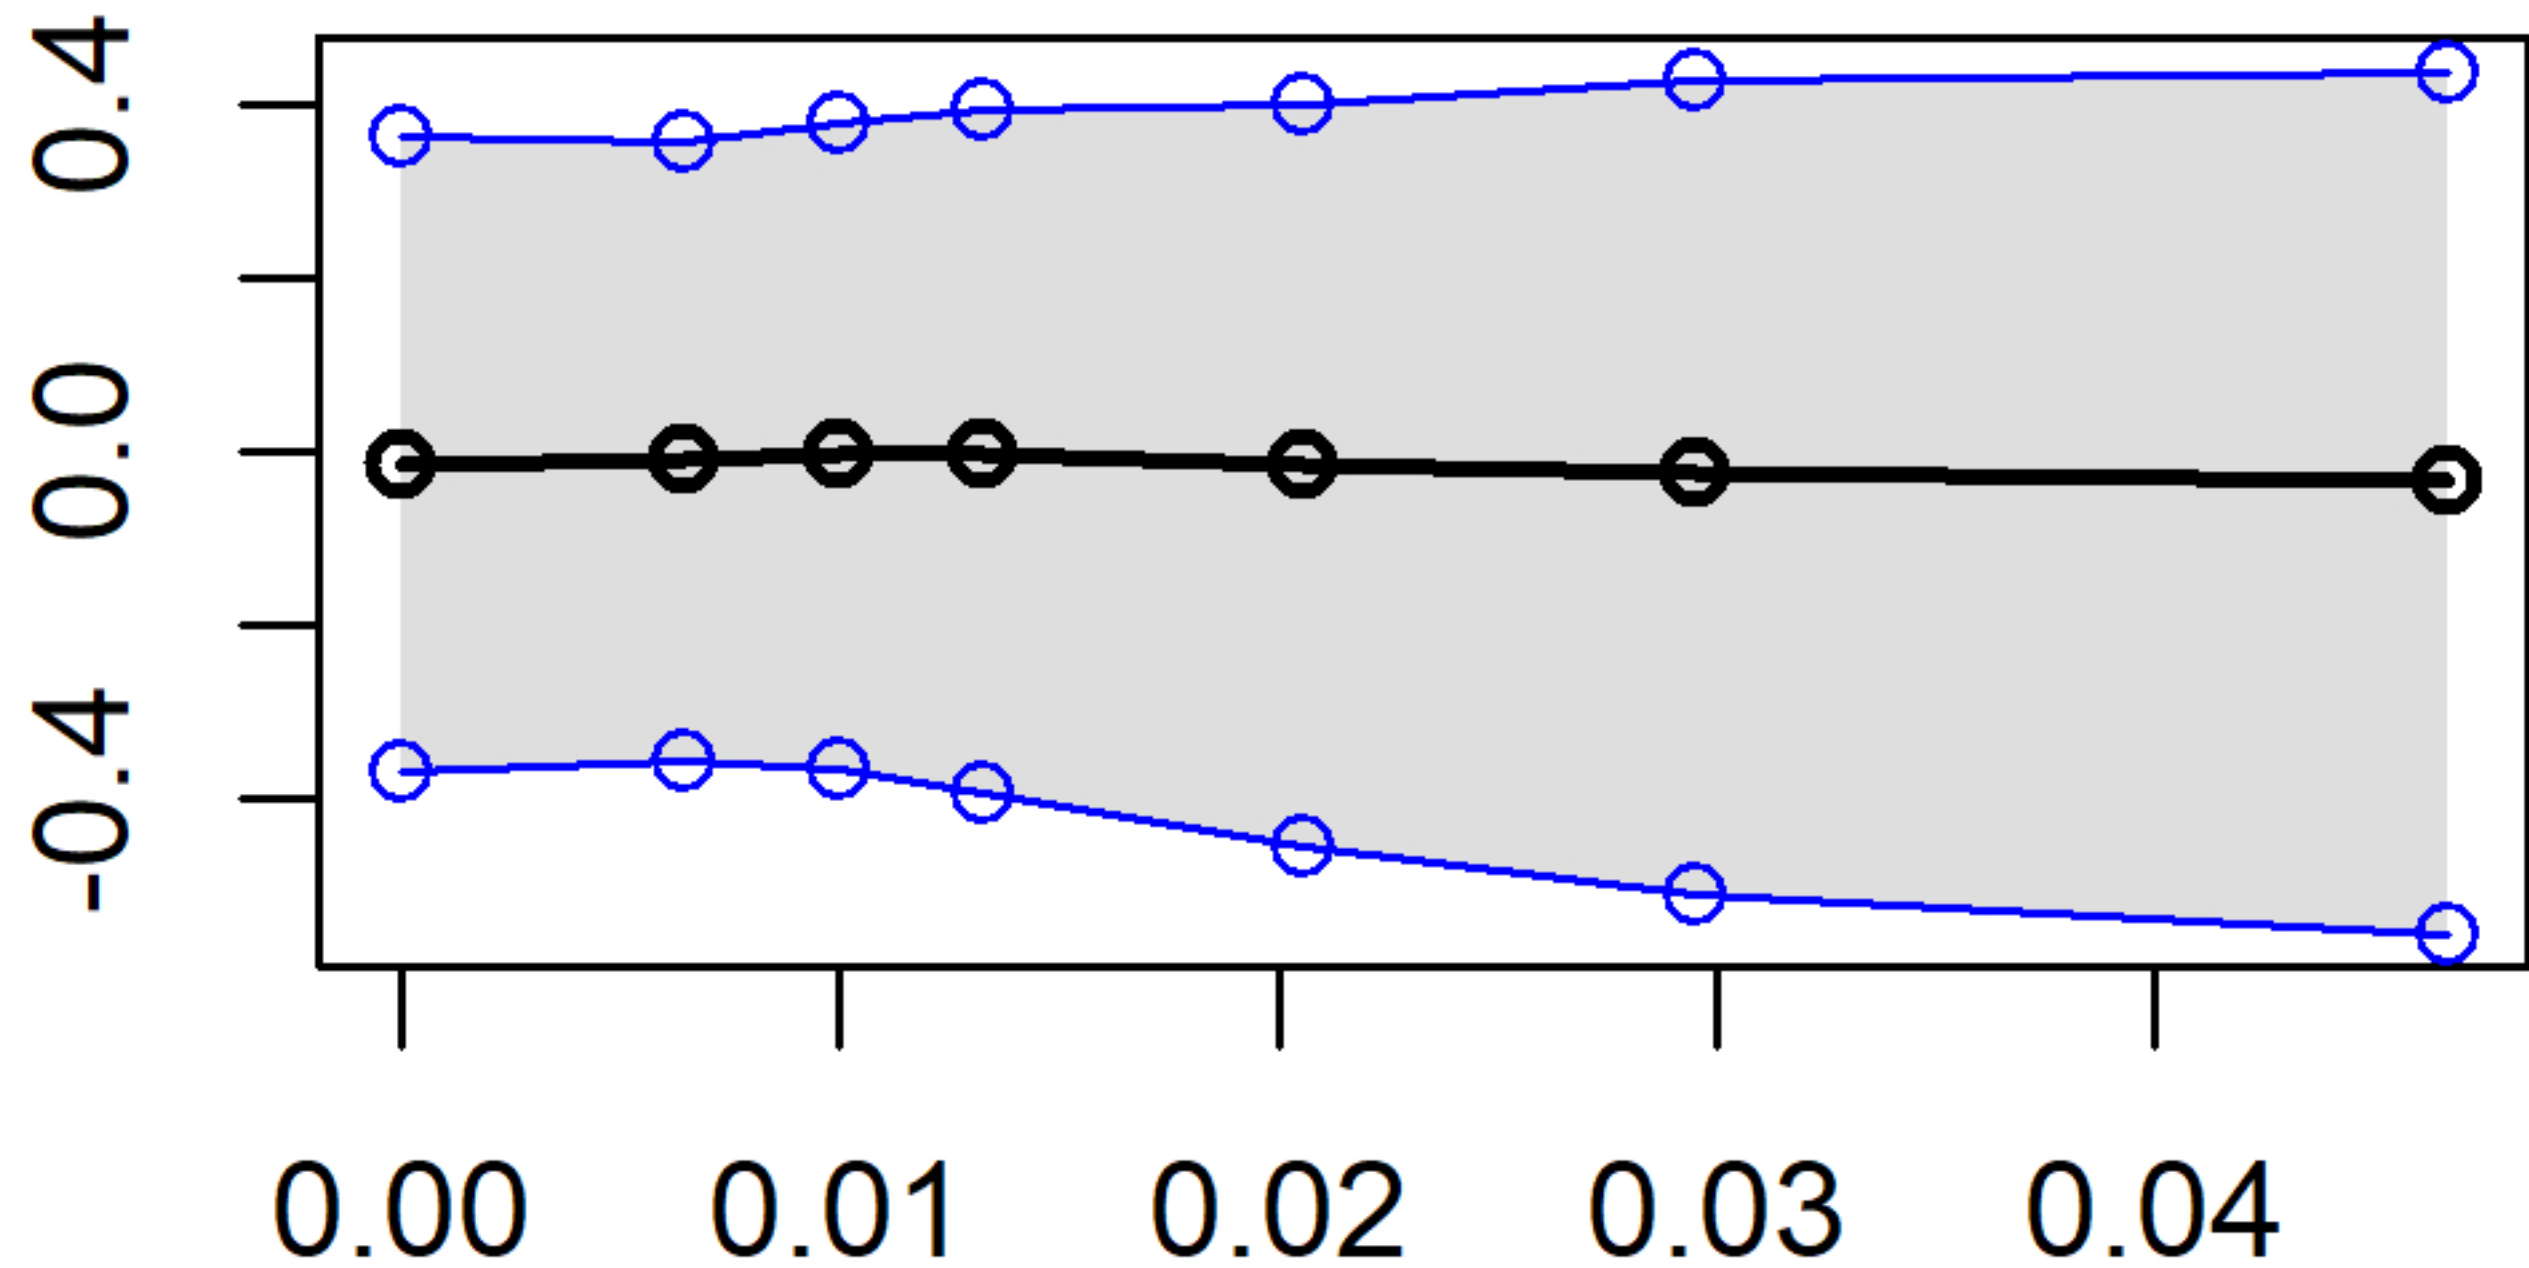

OTU65 plotted at specified quantiles
