# Supplementary figures and images for: Integration of the Microbiome, Metabolome and Transcriptomics Data Identified Novel Metabolic Pathway Regulation in Colorectal Cancer
Source: MDPI journal article supplement (doi:10.3390/ijms22115763), 2021-05-28

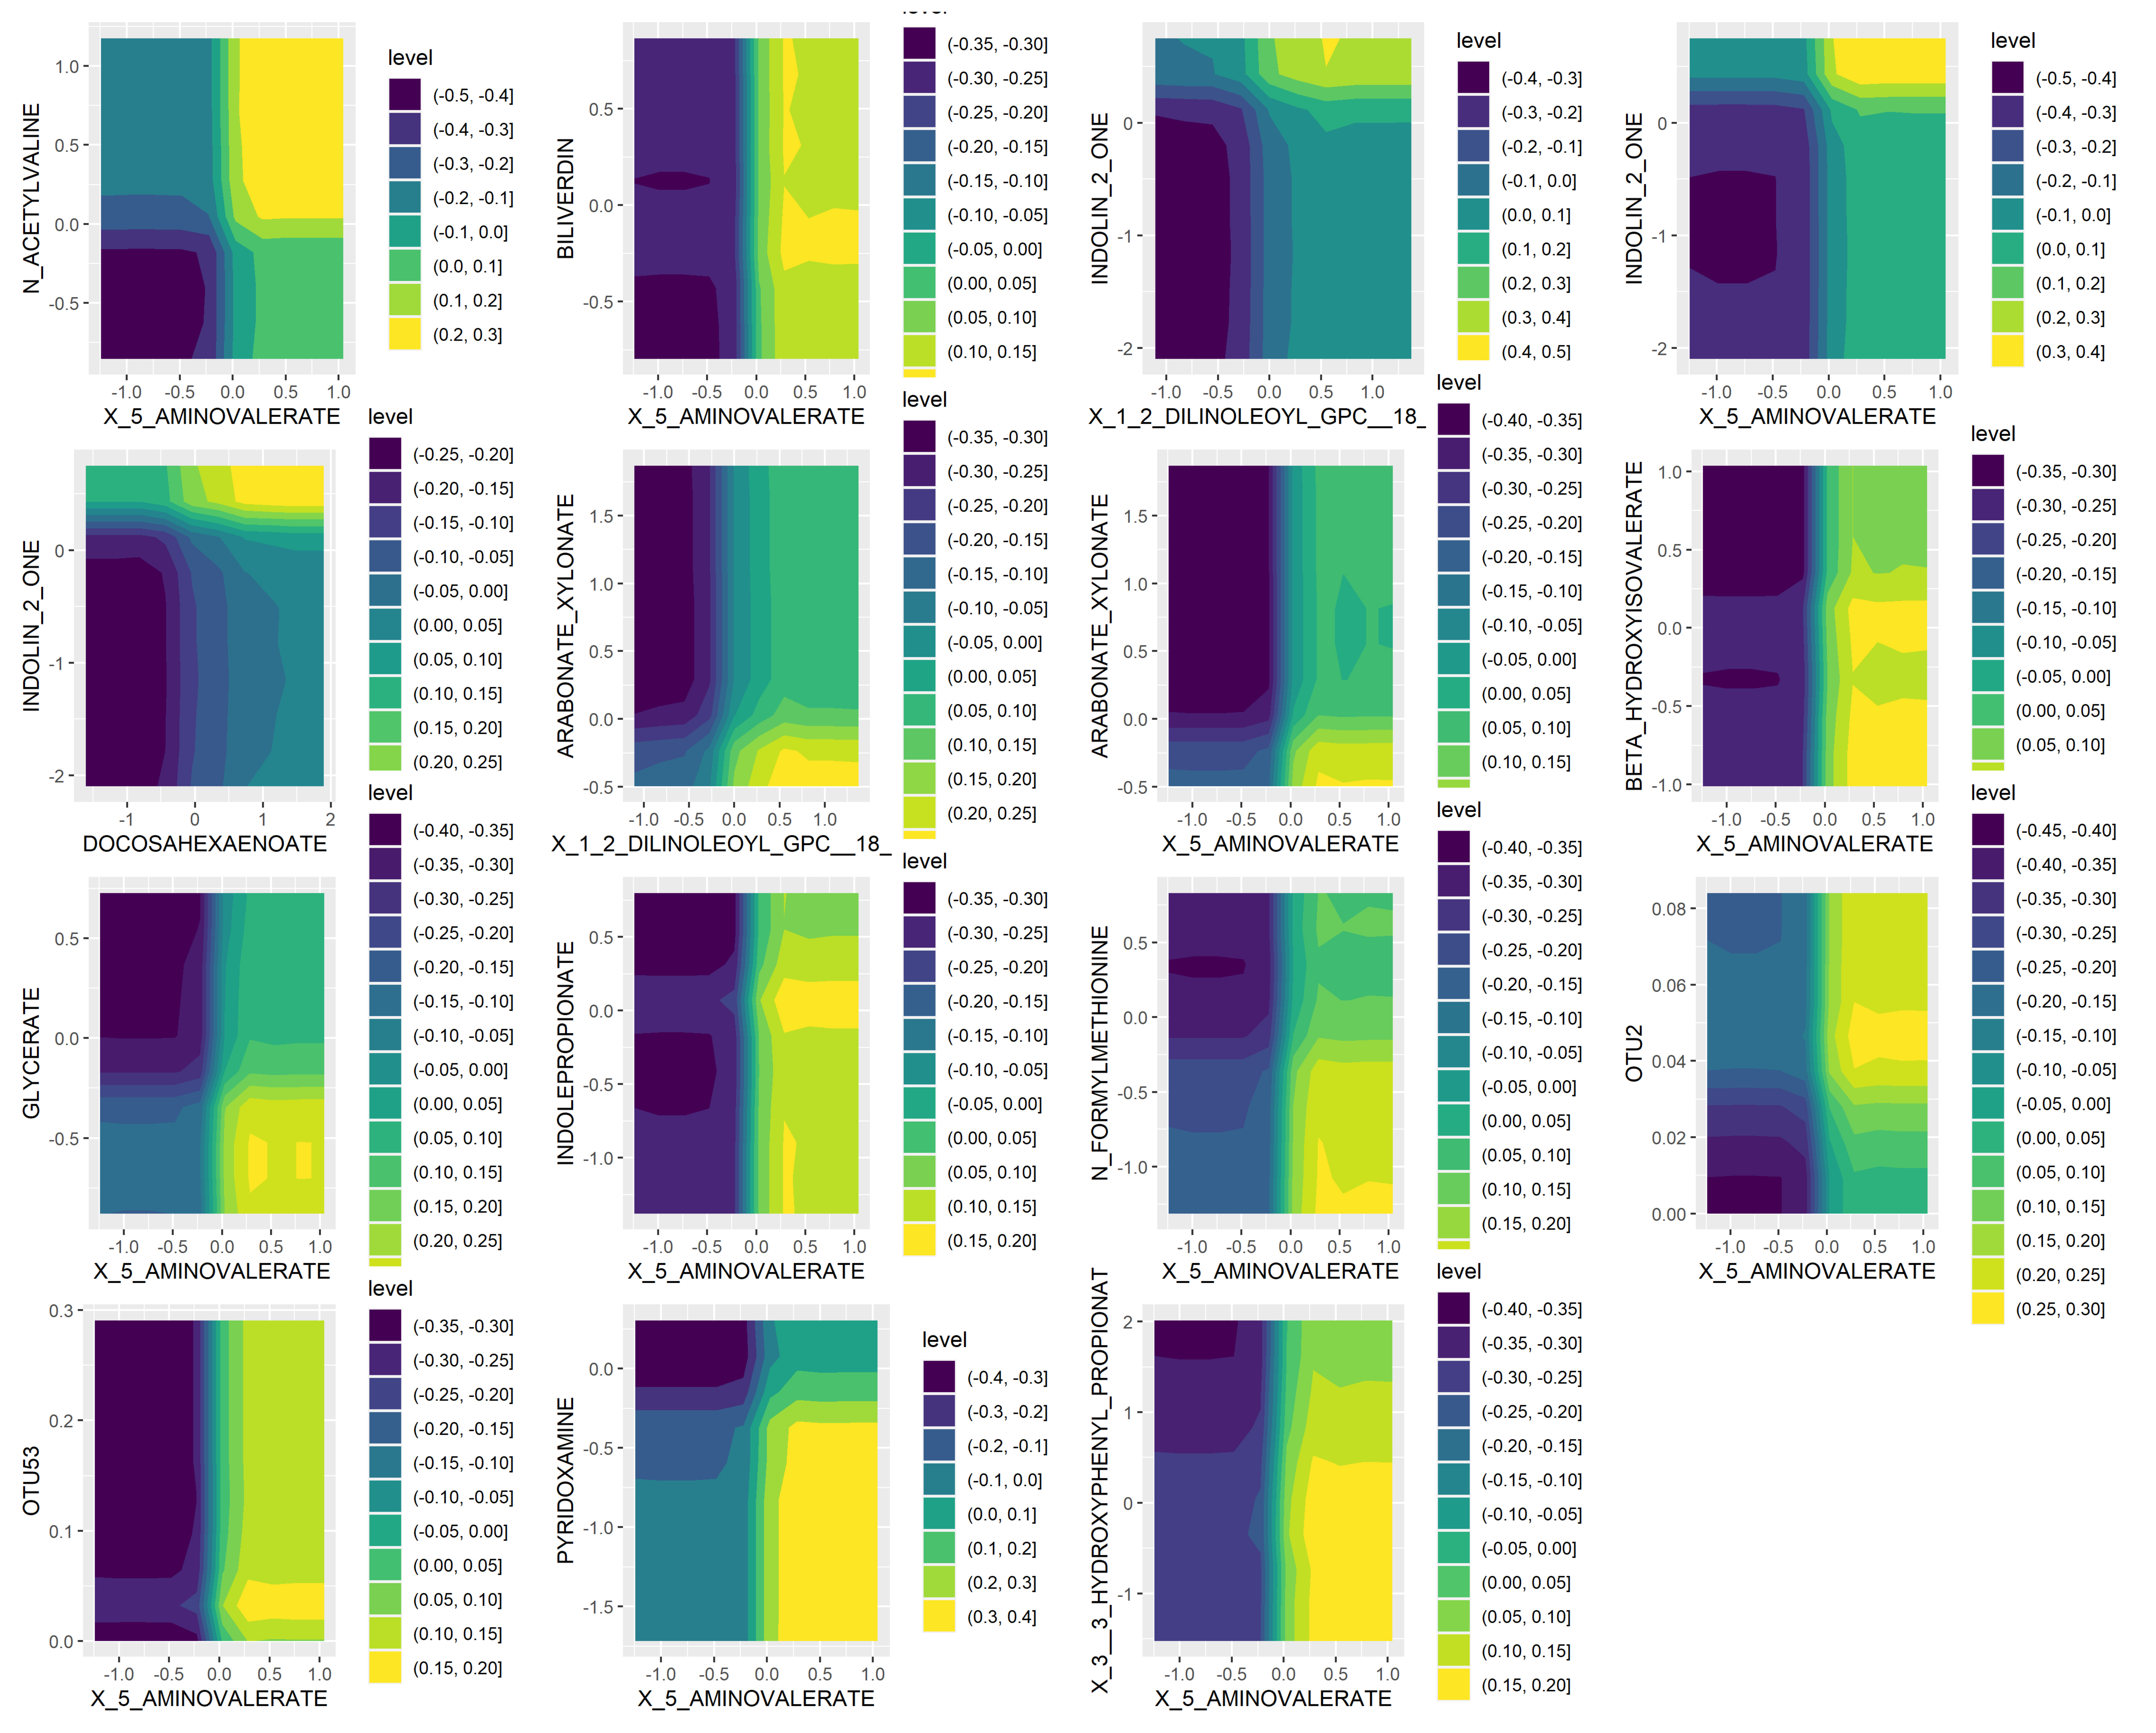

Supplement: s1 [file s1]
